# Supplementary material for: A Multi-Species TaqMan PCR Assay for the Identification of Asian Gypsy Moths (Lymantria spp.) and Other Invasive Lymantriines of Biosecurity Concern to North America
Source: PLoS One. 2016 Aug 11;11(8):e0160878. doi: 10.1371/journal.pone.0160878 (PMC4981461; doi:10.1371/journal.pone.0160878)
Supplement: S1 File — (XLSX) [file pone.0160878.s001.xlsx]

## Sheet: COI Lymantriine General Primers
	Table 1: Lep COI general primer set. This primer pair was designed to amplify all the species on the priority list. Degeneracy was kept to three degenerate bases in order to conserve the efficiency of the amplification.
	The primer pair is used in a SYBR Green amplification to estimate the copy number of the mitochondrial COI gene.
	Figure 1: Primer and probe alignment for the Lep COI general primer set. The majority of SNPs are covered by a degenerate base. The annealing temperature was set at 50oC
	to compensate for the species that have SNPs not covered by a degenerate base.

## Sheet: Duplex assay 1A
Table 1: L. albescens COI Taqman discrimination assay results. This assay is designed to amplify Lymantria albescens and Lymantria postalba while discriminating all other species on the priority list.
DNA sample ID	Species/Subspecies	Sampling Location	COI copy number - DNA extract	COI copy number - working DNA dilution	Run1-1	Run1-2	Run1-3	Run2-1	Run2-2	Run2-3	Comments
CFIA-LEP0246	L. albescens	Japan	59823	1000	24.3	24.34	24.38	24.09	24.23	24.22
CFIA-LEP0247	L. albescens	Japan	171087	1000	23.63	23.81	23.84	23.56	23.47	23.65
CFIA-LEP0306	L. albescens	Japan	8758	1000	23.23	23.15	23.26	22.98	23.06	22.99
CFIA-LEP0307	L. albescens	Japan	6249	1000	22.45	22.43	22.37	22.27	22.4	22.3
AGM-501	L. postalba	Japan, Shikoku	1397	1000	23.83	23.91	23.86	nd	nd	nd
AGM-521	L. postalba	Japan, Kyusyu	2255	2000	22.5	22.34	22.42	nd	nd	nd
AGM-01	L. dispar japonica	Japan, Nagano	465545	1000	No Ct	No Ct	No Ct	No Ct	No Ct	No Ct
AGM-09	L. dispar asiatica	Russia	47673	1000	No Ct	No Ct	No Ct	No Ct	No Ct	No Ct
AGM-15	L. dispar japonica	Japan, Nagano	128628	1000	No Ct	No Ct	No Ct	No Ct	No Ct	No Ct
AGM-16	L. dispar japonica	Japan, Kimitsu	87679	1000	No Ct	No Ct	No Ct	No Ct	No Ct	No Ct
AGM-17	L. dispar japonica	Japan, Kimitsu	21000	1000	38.32	No Ct	No Ct	No Ct	No Ct	No Ct	Suspected DNA contamination
AGM-18	L. dispar asiatica	South Korea, Kangwon	162231	1000	No Ct	No Ct	No Ct	No Ct	No Ct	No Ct
AGM-24	L. dispar asiatica	Russia, Primorsky Kray	66110	1000	No Ct	No Ct	No Ct	No Ct	No Ct	No Ct
AGM-25	L. dispar asiatica	Russia, Vladivostok	4902	1000	No Ct	No Ct	No Ct	No Ct	No Ct	No Ct
AGM-26	L. dispar asiatica	South Korea, Kangwon	32186	1000	No Ct	No Ct	No Ct	No Ct	No Ct	No Ct
AGM-27	L. dispar asiatica	South Korea, Kangwon	17985	1000	No Ct	No Ct	No Ct	No Ct	No Ct	No Ct
AGM-31	L. dispar japonica	Japan, Fujikawa	52445	1000	No Ct	No Ct	No Ct	No Ct	No Ct	No Ct
AGM-33	L. dispar japonica	Japan, Fujikawa	39663	1000	No Ct	No Ct	No Ct	No Ct	No Ct	No Ct
AGM-34	L. dispar japonica	Japan, Kimitsu	3535	1000	No Ct	No Ct	No Ct	No Ct	No Ct	No Ct
CFS-1	L. dispar japonica	Japan, Honshu	594188	2000	No Ct	No Ct	No Ct	No Ct	No Ct	No Ct
CFS-3	L. dispar asiatica	China, Tianjin	308702	2069	No Ct	No Ct	No Ct	No Ct	No Ct	No Ct
CFS-4	L. dispar asiatica	Mongolia	2431235	2000	No Ct	No Ct	No Ct	No Ct	No Ct	No Ct
CFS-5	L. dispar asiatica	China, Beijing	6247015	2000	No Ct	No Ct	No Ct	No Ct	No Ct	No Ct
CFS-6	L. dispar asiatica	China, Heilongjang	6257544	2000	No Ct	No Ct	No Ct	No Ct	No Ct	No Ct
CFS-7	L. dispar asiatica	China, Liaoning	1523445	2000	No Ct	No Ct	No Ct	No Ct	No Ct	No Ct
CFS-9	L. dispar asiatica	Russia, Far East	6181458	2000	No Ct	No Ct	No Ct	No Ct	No Ct	No Ct
CFIA-LEP0452	L. umbrosa	Japan?	185936	1000	No Ct	No Ct	No Ct	No Ct	No Ct	No Ct
CFS-8	L. dispar dispar	Russia, Siberia	4906088	2000	No Ct	No Ct	No Ct	No Ct	No Ct	No Ct
CFS-10	L. dispar dispar	Europe, Lithuania	6504376	2000	No Ct	No Ct	No Ct	No Ct	No Ct	No Ct
CFS-11	L. dispar dispar	Europe, Greece	6903386	2000	No Ct	No Ct	No Ct	No Ct	No Ct	No Ct
CFS-12	L. dispar dispar	USA, Conneticut	241535	2081	No Ct	No Ct	No Ct	No Ct	No Ct	No Ct
AGM-23	L. dispar dispar	Newark, USA	4776	1000	No Ct	No Ct	No Ct	No Ct	No Ct	No Ct
AGM-151	L. dispar dispar	Canada, BC	20789.7	1000	No Ct	No Ct	No Ct	No Ct	No Ct	No Ct
AGM-2	L. mathura	Japan, Nagano	858862	1000	No Ct	No Ct	No Ct	No Ct	No Ct	No Ct
AGM-50	L. mathura	Japan, Nagano	187046	1000	No Ct	No Ct	No Ct	No Ct	No Ct	No Ct
AGM-51	L. mathura	Japan, Fujikawa	8597	1000	No Ct	No Ct	No Ct	No Ct	No Ct	No Ct
AGM-52	L. mathura	South Korea, Kangwon	54982	1000	No Ct	No Ct	No Ct	No Ct	No Ct	No Ct
AGM-54	L. mathura	China, Yunnan	165800	1000	No Ct	No Ct	No Ct	No Ct	No Ct	No Ct
AGM-36	L. monacha	Japan, Nagano	14670	1000	No Ct	No Ct	No Ct	No Ct	No Ct	No Ct
AGM-67	L. monacha	Japan	8407	1000	No Ct	No Ct	No Ct	No Ct	No Ct	No Ct
CFS-14	L. monacha	Czech Republic	1028678	2000	No Ct	No Ct	No Ct	No Ct	No Ct	No Ct
CFIA-LEP0341	L. monacha	China	52036	1000	No Ct	No Ct	No Ct	No Ct	No Ct	No Ct
AGM-68	L. lucescens	Japan, Nagano	15851	1000	No Ct	No Ct	No Ct	No Ct	No Ct	No Ct
CFIA-LEP093	L. lucescens	South Korea	11343	1000	No Ct	No Ct	No Ct	No Ct	No Ct	No Ct
CFIA-LEP094	L. lucescens	South Korea	10174	1000	No Ct	No Ct	No Ct	No Ct	No Ct	No Ct
AGM-47	L. fumida	USA, Newark	2253	1000	No Ct	No Ct	No Ct	No Ct	No Ct	No Ct
AGM-127	Cifuna locuples	China, Yunnan	56495	2621	No Ct	No Ct	No Ct	No Ct	No Ct	No Ct
AGM-132	Cifuna locuples	South Korea, Gwangyang	9620	2847	No Ct	No Ct	No Ct	No Ct	No Ct	No Ct
AGM-115	Calliteara pudibunda	Japan, Yamanachi	55486	1440	No Ct	No Ct	No Ct	No Ct	No Ct	No Ct
AGM-138	Arctornis l-nigurm	Japan, Nagano	48720	1243	No Ct	No Ct	No Ct	No Ct	No Ct	No Ct
AGM-139	Arctornis l-nigurm	South Korea, Gwangyang	135286	720	No Ct	No Ct	No Ct	No Ct	No Ct	No Ct
AGM-107	Calliteara abietis	Japan, Yamanachi	17028	1655	No Ct	No Ct	No Ct	No Ct	No Ct	No Ct
AGM-134	Orgyia thyellina	Japan, Okayama	800	800	No Ct	No Ct	No Ct	No Ct	No Ct	No Ct
AGM-121	Euproctis similis	Japan, Nagano	3958	3958	No Ct	No Ct	No Ct	No Ct	No Ct	No Ct
AGM-42	L. xylina	Japan, Kimitsu	36119	1000	No Ct	No Ct	No Ct	No Ct	No Ct	No Ct
CFIA-LEP0253	L. xylina	Taiwan	456078	1000	No Ct	No Ct	No Ct	No Ct	No Ct	No Ct
CFIA-LEP0311	L. xylina	Japan	113497	1000	No Ct	No Ct	39.95	No Ct	No Ct	No Ct	Contamination verified
AGM-40	Lymantria minomonis	Japan, Nagano	55086	1000	No Ct	No Ct	No Ct	No Ct	No Ct	No Ct
AGM-93	Leucoma salicis	Japan, Nagano	3068	3068	No Ct	No Ct	No Ct	No Ct	No Ct	No Ct
AGM-96	Leucoma salicis	China, Beijing	1926	1926	No Ct	No Ct	No Ct	No Ct	No Ct	No Ct
AGM-0164	Lymantria concolor	Thailand, Kanchanaburi	10157.9	1000	No Ct	No Ct	No Ct	No Ct	No Ct	No Ct
AGM-0170	Lymantria atemeles	Thailand, Phayao	6451.83	1000	No Ct	No Ct	No Ct	No Ct	No Ct	No Ct
AGM-71	Lymantria bantaizana	Japan, Nagano	3663	3663	No Ct	No Ct	No Ct	No Ct	No Ct	No Ct
	Ct is set at 10% Fmax
	Run 1 - 7500 Fast 2
	Run - 7500 Fast 2
	Figure 1: L. albescens COI Taqman discrimination assay results (Applied Biosystems 7500 Fast). This assay amplifies Lymantria albescens and
	Lymantria postalba while discriminating all other species on the priority list. Forty-five cycles of qPCR were run and the Ft was set at 10% of Fmax.
	Table 2: L. albescens COI primer and probe set. The forward and reverse primers both contain an ARMs base to increase discrimination.
	Figure 2: Primer and probe alignment for the Lymanatria albescens COI Taqman assay. An ARMs base was added to both the forward and reverse primers to increase discrimination of the
	AGM complex samples as well as the L. dispar dispar samples as the probe is non-discriminatory for them.

## Sheet: Duplex assay 1B
Table 1: AGM complex COI Taqman discrimination assay results. This assay is designed to amplify L. dispar asiatica, L. dispar japonica and L. umbrosa while discriminating all other species on the priority list.
DNA sample ID	Species/Subspecies	Sampling Location	COI copy number - DNA extract	COI copy number - working DNA dilution	Run1-1	Run1-2	Run1-3	Run2-1	Run2-2	Run2-3	Comments
AGM-01	L. dispar japonica	Japan, Nagano	465545	1000	27.97	28.05	28.12	27.9	28.08	28.12
AGM-09	L. dispar asiatica	Russia	47673	1000	27.42	27.37	27.41	27.33	27.28	27.36
AGM-15	L. dispar japonica	Japan, Nagano	128628	1000	27.35	27.22	27.02	27.23	27.14	26.97
AGM-16	L. dispar japonica	Japan, Kimitsu	87679	1000	26.68	26.63	26.86	26.5	26.49	26.76
AGM-17	L. dispar japonica	Japan, Kimitsu	21000	1000	26.77	26.76	26.57	26.55	26.56	26.43
AGM-18	L. dispar asiatica	South Korea, Kangwon	162231	1000	27.12	27.01	26.95	26.92	26.91	26.82
AGM-24	L. dispar asiatica	Russia, Primorsky Kray	66110	1000	26.01	26.12	26.1	26.04	25.96	26.21
AGM-25	L. dispar asiatica	Russia, Vladivostok	4902	1000	25.31	25.18	25.32	25.13	25	25.28
AGM-26	L. dispar asiatica	South Korea, Kangwon	32186	1000	25.12	24.89	24.89	24.96	24.93	24.83
AGM-27	L. dispar asiatica	South Korea, Kangwon	17985	1000	25.09	25.23	25.22	25.05	24.95	25.13
AGM-31	L. dispar japonica	Japan, Fujikawa	52445	1000	24.6	24.55	24.75	24.42	24.43	24.5
AGM-33	L. dispar japonica	Japan, Fujikawa	39663	1000	24.34	24.44	24.58	24.52	24.44	24.47
AGM-34	L. dispar japonica	Japan, Kimitsu	3535	1000	25.59	25.4	25.36	25.31	25.19	25.05
CFS-1	L. dispar japonica	Japan, Honshu	594188	2000	23.52	23.33	23.35	23.3	23.19	23.11
CFS-3	L. dispar asiatica	China, Tianjin	308702	2069	25.95	25.98	26.07	25.82	25.84	25.96
CFS-4	L. dispar asiatica	Mongolia	2431235	2000	24.82	24.88	24.74	24.89	24.76	24.61
CFS-5	L. dispar asiatica	China, Beijing	6247015	2000	24.09	24.19	24.11	23.96	23.96	23.87
CFS-6	L. dispar asiatica	China, Heilongjang	6257544	2000	24.92	25	24.98	24.99	24.84	24.88
CFS-7	L. dispar asiatica	China, Liaoning	1523445	2000	25.56	25.55	25.38	25.32	25.32	25.2
CFS-9	L. dispar asiatica	Russia, Far East	6181458	2000	23.86	23.81	23.98	23.68	23.75	23.8
CFIA-LEP0452	L. umbrosa	Japan?	185936	1000	23.81	23.95	23.88	23.92	23.92	23.68
AGM-501	L. postalba	Japan, Shikoku	1397	1000	No Ct	No Ct	No Ct	nd	nd	nd
AGM-521	L. postalba	Japan, Kyusyu	2255	2000	No Ct	No Ct	No Ct	nd	nd	nd
AGM565	L. albescens	Okinawa-jima Is.	450	450	No Ct	No Ct	No Ct	nd	nd	nd
CFIA-LEP0246	L. albescens	Japan	59823	1000	No Ct	No Ct	No Ct	No Ct	No Ct	No Ct
CFIA-LEP0247	L. albescens	Japan	171087	1000	No Ct	No Ct	No Ct	No Ct	No Ct	No Ct
CFIA-LEP0306	L. albescens	Japan	8758	1000	37.35	No Ct	No Ct	No Ct	No Ct	No Ct	Contamination verified
CFIA-LEP0307	L. albescens	Japan	6249	1000	No Ct	No Ct	No Ct	No Ct	No Ct	No Ct
CFS-8	L. dispar dispar	Russia, Siberia	4906088	2000	No Ct	No Ct	No Ct	No Ct	No Ct	No Ct
CFS-10	L. dispar dispar	Europe, Lithuania	6504376	2000	No Ct	No Ct	No Ct	No Ct	No Ct	No Ct
CFS-11	L. dispar dispar	Europe, Greece	6903386	2000	No Ct	No Ct	No Ct	No Ct	No Ct	No Ct
CFS-12	L. dispar dispar	USA, Conneticut	241535	2081	No Ct	No Ct	No Ct	37.61	No Ct	No Ct	Suspected DNA contamination
AGM-23	L. dispar dispar	Newark, USA	4776	1000	No Ct	No Ct	No Ct	No Ct	No Ct	No Ct
AGM-151	L. dispar dispar	Canada, BC	20789.7	1000	No Ct	No Ct	No Ct	No Ct	No Ct	No Ct
CFIA-LEP0146	L. dispar dispar	Iran	6955	1000	No Ct	No Ct	No Ct	No Ct	No Ct	No Ct
AGM-2	L. mathura	Japan, Nagano	858862	1000	No Ct	No Ct	No Ct	No Ct	No Ct	No Ct
AGM-50	L. mathura	Japan, Nagano	187046	1000	No Ct	No Ct	No Ct	No Ct	No Ct	No Ct
AGM-51	L. mathura	Japan, Fujikawa	8597	1000	No Ct	No Ct	No Ct	No Ct	No Ct	No Ct
AGM-52	L. mathura	South Korea, Kangwon	54982	1000	No Ct	No Ct	No Ct	No Ct	No Ct	No Ct
AGM-54	L. mathura	China, Yunnan	165800	1000	No Ct	No Ct	No Ct	No Ct	No Ct	No Ct
AGM-36	L. monacha	Japan, Nagano	14670	1000	No Ct	No Ct	No Ct	No Ct	36.41	No Ct	Contamination verified
AGM-67	L. monacha	Japan	8407	1000	No Ct	No Ct	No Ct	No Ct	No Ct	No Ct
CFS-14	L. monacha	Czech Republic	1028678	2000	No Ct	No Ct	No Ct	No Ct	No Ct	No Ct
CFIA-LEP0341	L. monacha	China	52036	1000	No Ct	No Ct	No Ct	No Ct	No Ct	No Ct
AGM-68	L. lucescens	Japan, Nagano	15851	1000	No Ct	No Ct	No Ct	No Ct	No Ct	No Ct
CFIA-LEP093	L. lucescens	South Korea	11343	1000	No Ct	No Ct	No Ct	No Ct	No Ct	No Ct
CFIA-LEP094	L. lucescens	South Korea	10174	1000	No Ct	No Ct	No Ct	No Ct	No Ct	No Ct
AGM-47	L. fumida	USA, Newark	2253	1000	No Ct	No Ct	No Ct	No Ct	No Ct	No Ct
AGM-127	Cifuna locuples	China, Yunnan	56495	2621	No Ct	No Ct	No Ct	No Ct	No Ct	No Ct
AGM-132	Cifuna locuples	South Korea, Gwangyang	9620	2847	No Ct	No Ct	No Ct	No Ct	No Ct	No Ct
AGM-115	Calliteara pudibunda	Japan, Yamanachi	55486	1440	No Ct	No Ct	No Ct	No Ct	No Ct	No Ct
AGM-138	Arctornis l-nigurm	Japan, Nagano	48720	1243	No Ct	No Ct	No Ct	No Ct	No Ct	No Ct
AGM-139	Arctornis l-nigurm	South Korea, Gwangyang	135286	720	No Ct	No Ct	No Ct	No Ct	No Ct	No Ct
AGM-107	Calliteara abietis	Japan, Yamanachi	17028	1655	No Ct	No Ct	No Ct	No Ct	No Ct	No Ct
AGM-134	Orgyia thyellina	Japan, Okayama	800	800	No Ct	No Ct	No Ct	No Ct	No Ct	No Ct
AGM-121	Euproctis similis	Japan, Nagano	3958	3958	No Ct	No Ct	No Ct	No Ct	No Ct	No Ct
AGM-42	L. xylina	Japan, Kimitsu	36119	1000	No Ct	No Ct	No Ct	No Ct	No Ct	37.7	Contamination verified
CFIA-LEP0253	L. xylina	Taiwan	456078	1000	No Ct	No Ct	No Ct	No Ct	No Ct	No Ct
CFIA-LEP0311	L. xylina	Japan	113497	1000	No Ct	43.19	No Ct	No Ct	No Ct	No Ct	Suspected DNA contamination
AGM-40	Lymantria minomonis	Japan, Nagano	55086	1000	No Ct	No Ct	No Ct	No Ct	No Ct	No Ct
AGM-93	Leucoma salicis	Japan, Nagano	3068	3068	No Ct	No Ct	No Ct	No Ct	No Ct	No Ct
AGM-96	Leucoma salicis	China, Beijing	1926	1926	No Ct	No Ct	No Ct	No Ct	No Ct	No Ct
AGM-0164	Lymantria concolor	Thailand, Kanchanaburi	10157.9	1000	No Ct	No Ct	No Ct	No Ct	No Ct	No Ct
AGM-0170	Lymantria atemeles	Thailand, Phayao	6451.83	1000	No Ct	No Ct	No Ct	No Ct	No Ct	No Ct
AGM-71	Lymantria bantaizana	Japan, Nagano	3663	3663	No Ct	No Ct	No Ct	No Ct	No Ct	No Ct
	Ct is set at 10% Fmax
	Run 1 - 7500 Fast 2
	Run 2 - 7500 Fast 2
	Figure 1: AGM complex COI Taqman discrimination assay results (Applied Biosystems 7500 Fast). This assay amplifies L. dispar asiatica, L. dispar japonica
	and L. umbrosa while discriminating all other species on the priority list. Forty-five cycles of qPCR were run and the Ft was set at 10% of Fmax.
	Table 2: AGM complex COI primer and probe set. The forward primer has an ARMs base at position 3 and there are degenerate bases at positions 1 and 4.
	The position four degenerate base was inserted for all L. umbrosa. The position 1 base was inserted to pick up one L. dispar asiatica line and one L. dispar japonica line.
	Figure 2: Primer and probe alignment for the AGM complex COI Taqman assay. An ARMs base was added to the forward primer to increase discrimination. The majority of the non-target species will be discriminated with the LNA probe (red letters designate LNA bases).
	The C/T SNP present at position 646 in the probe is sufficient to discriminate L. dispar dispar (the calculated Tm of the probe for L. dispar dispar is 40.5oC).
	The reverse primer is in the 3P region of the COI gene and was designed to help discriminate L. albescens.
	Degeneracy was introduced at two sites within the forward primer to enable amplification of L. d. asiatica and L. umbrosa samples.

## Sheet: Duplex assay 2A
Table 1: Ldaj COI Taqman discrimination assay results. This assay is run against the positive samples from the AGM complex COI assay. The assay is designed to amplify L. dispar asiatica and L. dispar japonica while discriminating L. umbrosa.
DNA sample ID	Species/Subspecies	Sampling Location	COI copy number - DNA extract	COI copy number - working DNA dilution	Run1-1	Run1-2	Run1-3	Run2-1	Run2-2	Run2-3	Run3-1	Run3-2	Run3-3	Comments
AGM-01	Lymantria dispar japonica	Japan, Nagano	465545	1000	27.83	28.25	28.07	27.83	27.89	28.11	27.79	28.02	27.88
AGM-09	Lymantria dispar asiatica	Russia	47673	1000	27	27.24	27.21	26.98	27.02	26.94	26.92	27.14	27.12
AGM-15	Lymantria dispar japonica	Japan, Nagano	128628	1000	27.45	26.83	26.91	26.97	26.95	26.89	26.85	26.92	27.04
AGM-16	Lymantria dispar japonica	Japan, Kimitsu	87679	1000	26.35	26.36	26.68	26.32	26.49	26.58	26.38	26.42	26.35
AGM-17	Lymantria dispar japonica	Japan, Kimitsu	21000	1000	27.03	27.04	26.81	26.95	26.94	26.61	26.94	26.92	27.02
AGM-18	Lymantria dispar asiatica	South Korea, Kangwon	162231	1000	26.89	26.83	26.82	26.59	26.71	26.69	26.62	26.74	26.56
AGM-24	Lymantria dispar asiatica	Russia, Primorsky Kray	66110	1000	25.33	25.6	25.68	25.32	25.3	25.3	25.36	25.32	25.41
AGM-26	Lymantria dispar asiatica	South Korea, Kangwon	32186	1000	24.53	24.37	24.35	24.21	24.08	24.13	24.16	24.22	24.1
AGM-27	Lymantria dispar asiatica	South Korea, Kangwon	17985	1000	25.43	25.35	25.27	25.25	25.31	25.34	25.22	25.36	25.27
AGM-31	Lymantria dispar japonica	Japan, Fujikawa	52445	1000	25.31	25.4	25.34	25.09	25.1	25.04	25.18	25.03	25.11
AGM-33	Lymantria dispar japonica	Japan, Fujikawa	39663	1000	25.26	25.14	25.22	24.87	24.72	25.13	24.76	24.8	24.95
CFS-1	Lymantria dispar japonica	Japan, Honshu	594188	2000	25.85	25.83	25.77	25.42	25.49	25.44	25.38	25.46	25.57
CFS-3	Lymantria dispar asiatica	China, Tianjin	308702	2069	26.04	26.04	26.03	25.88	25.96	25.82	25.83	25.96	25.88
CFS-4	Lymantria dispar asiatica	Mongolia	2431235	2000	25.5	25.56	25.46	24.98	24.89	24.98	24.96	24.93	24.86
CFS-5	Lymantria dispar asiatica	China, Beijing	6247015	2000	24.1	24.22	24.21	23.95	23.97	24.06	23.9	23.97	24.16
CFS-6	Lymantria dispar asiatica	China, Heilongjang	6257544	2000	25.47	25.68	25.7	25.32	25.46	25.37	25.33	25.39	25.51
CFS-7	Lymantria dispar asiatica	China, Liaoning	1523445	2000	26.32	26.35	26.2	25.77	25.65	25.91	25.84	25.93	26.02
CFS-9	Lymantria dispar asiatica	Russia, Far East	6181458	2000	24.09	24	24.41	23.87	23.91	23.88	23.85	23.98	23.9
CFIA-LEP0452	Lymantria umbrosa	Japan?	185936	2000	No Ct	No Ct	No Ct	No Ct	No Ct	No Ct	No Ct	No Ct	No Ct
	Ct is set at 10% Fmax
	Run 1 - 7500 Fast 1
	Run 2 - 7500 Fast 2
	Figure 1: AGM complex COI Taqman discrimination assay results (Applied Biosystems 7500 Fast). This assay amplifies L. dispar asiatica and
	L. dispar japonica while discriminating L. umbrosa . Forty-five cycles of qPCR were run and the Ft was set at 10% of Fmax.
	There is a slight drift in the baseline for the L. umbrosa DNA sample but there is no amplification.
	Table 2: Ldaj COI primer and probe set. The forward and reverse primers are common for all species in the assay. L. umbrosa is discriminated with a single SNP in the LNA probe
	Figure 2: Primer and probe alignment for the Ldaj COI Taqman assay. L. umbrosa is discriminated with a single SNP in an LNA probe (red letters designate LNA bases).

## Sheet: Duplex assay 2B
Table 1: Lda COI-3P Taqman discrimination assay results. This assay is run against the positive samples from the Ldaj COI assay.
The assay is designed to amplify L. dispar asiatica while discriminating L. dispar japonica. This assay was designed in the 3P region of the COI gene.
DNA sample ID	Species/Subspecies	Sampling Location	COI copy number - DNA extract	COI copy number - working DNA dilution	Run1-1	Run1-2	Run1-3	Run2-1	Run2-2	Run2-3
AGM-03	Lymantria dispar asiatica	China, Xinjiang	724	724	25.25	25.43	25.45	24.94	25.19	25.14
AGM-09	Lymantria dispar asiatica	Russia	47673	1000	26.3	26.48	26.64	26.04	26.39	26.32
AGM-18	Lymantria dispar asiatica	South Korea, Kangwon	162231	1000	26.5	26.63	26.57	26.4	26.39	26.38
AGM-19	Lymantria dispar asiactica	South Korea, Kangwon	18022	1000	26.84	26.61	26.73	26.86	26.77	26.64
AGM-24	Lymantria dispar asiatica	Russia, Primorsky Kray	66110	1000	24.86	24.73	24.92	24.86	24.77	24.69
AGM-25	Lymantria dispar asiatica	Russia, Vladivostok	4902	1000	24.49	24.83	24.62	24.56	24.38	24.53
AGM-26	Lymantria dispar asiatica	South Korea, Kangwon	32186	1000	24.07	24.16	24.07	24.02	23.87	23.99
AGM-27	Lymantria dispar asiatica	South Korea, Kangwon	17985	1000	24.42	24.11	24.39	24.27	24.26	24.23
CFS-3	Lymantria dispar asiatica	China, Tianjin	308702	2069	26.49	26.44	26.67	26.12	26.16	26.28
CFS-4	Lymantria dispar asiatica	Mongolia	2431235	2000	24.65	24.41	24.42	24.43	24.38	24.46
CFS-5	Lymantria dispar asiatica	China, Beijing	6247015	2000	24.77	24.84	24.38	24.6	24.5	24.46
CFS-6	Lymantria dispar asiatica	China, Heilongjang	6257544	2000	24.76	24.7	24.58	24.71	24.54	24.5
CFS-7	Lymantria dispar asiatica	China, Liaoning	1523445	2000	25.59	25.97	25.73	25.44	25.84	25.84
CFS-9	Lymantria dispar asiatica	Russia, Far East	6181458	2000	24.65	24.39	24.52	24.44	24.19	24.34
AGM-01	Lymantria dispar japonica	Japan, Nagano	465545	1000	No Ct	NoCt	No Ct	NoCt	No Ct	NoCt
AGM-15	Lymantria dispar japonica	Japan, Nagano	128628	1000	No Ct	NoCt	No Ct	NoCt	No Ct	NoCt
AGM-16	Lymantria dispar japonica	Japan, Kimitsu	87679	1000	No Ct	NoCt	No Ct	NoCt	No Ct	NoCt
AGM-17	Lymantria dispar japonica	Japan, Kimitsu	21000	1000	No Ct	NoCt	No Ct	NoCt	No Ct	NoCt
AGM-29	Lymantria dispar japonica	Japan, Nagano	2772	1000	No Ct	NoCt	No Ct	NoCt	No Ct	NoCt
AGM-30	Lymantria dispar japonica	Japan, Iwate	915	200	No Ct	NoCt	No Ct	NoCt	No Ct	NoCt
AGM-31	Lymantria dispar japonica	Japan, Fujikawa	52445	1000	No Ct	NoCt	No Ct	NoCt	No Ct	NoCt
AGM-33	Lymantria dispar japonica	Japan, Fujikawa	39663	1000	No Ct	NoCt	No Ct	NoCt	No Ct	NoCt
AGM-34	Lymantria dispar japonica	Japan, Kimitsu	3535	1000	No Ct	NoCt	No Ct	NoCt	No Ct	NoCt
CFS-1	Lymantria dispar japonica	Japan, Honshu	594188	2000	No Ct	NoCt	No Ct	NoCt	No Ct	NoCt
CFS-2	Lymantria dispar japonica	Japan, Northern Iwate	1020	1020	No Ct	NoCt	No Ct	NoCt	No Ct	NoCt
	Ct is set at 10% Fmax
	Run 1 - 7500 Fast 2
	Run2 - 7500 Fast 2
	Figure 1: Lda COI-3P Taqman discrimination assay results (Applied Biosystems 7500 Fast). This assay amplifies L. dispar asiatica while
	discriminating L. dispar japonica. Forty-five cycles of qPCR were run and the Ft was set at 10% of Fmax.
	Table 2: Lda COI-3P primer and probe set. The forward and reverse primers are common for both species in the assay. L. dispar japonica is discriminated with a single SNP in the LNA probe.
	Figure 2: Primer and probe alignment for the Lda COI-3P Taqman assay. L. dispar japonica is discriminated with a single SNP in the LNA probe (red letters designate LNA bases). The amplicon is very short at 69bp.
	This assay is designed entirely in the 3P region of the COI gene.

## Sheet: Simplex assay 3A
Table 1: Lymantria dispar disapar (Ldd) COI Taqman discrimination assay results. This assay is designed to amplify L. dispar dispar while discriminating all other species on the priority list
except for the AGM complex species ( L. dispar asiatica, L. dispar japonica, L. umbrosa, L. albescens and L. postalba) which have already been positively identified.
DNA sample ID	Species/Subspecies	Sampling Location	COI copy number - DNA extract	COI copy number - working DNA dilution	Run1-1	Run1-2	Run1-3	Run2-1	Run2-2	Run2-3	Comment
CFS-8	L. dispar dispar	Russia, Siberia	4906088	2000	23.98	24.28	24.36	24.27	24.31	24.27
CFS-10	L. dispar dispar	Europe, Lithuania	6504376	2000	24.32	24.2	24.59	24.33	24.31	24.47
CFS-11	L. dispar dispar	Europe, Greece	6903386	2000	26.48	29.65	25.68	27.46	34.22	28.04
CFS-12	L. dispar dispar	USA, Conneticut	241535	2081	25.37	25.26	25.63	25.39	25.46	25.66
AGM-23	L. dispar dispar	Newark, USA	4776	1000	24.52	24.51	24.3	24.59	24.43	24.31
AGM-151	L. dispar dispar	Canada, BC	20789.7	1000	23.96	23.86	23.68	23.87	23.95	23.89
CFIA-LEP0146	L. dispar dispar	Iran	6955	1000	24.98	25.07	25.07	24.98	25.08	25.14
CFIA-LEP0147	L. dispar dispar	Iraq	2735	1000	25.62	25.73	25.59	25.54	25.56	25.45
AGM-2	L. mathura	Japan, Nagano	858862	1000	NoCt	NoCt	NoCt	NoCt	NoCt	NoCt
AGM-50	L. mathura	Japan, Nagano	187046	1000	NoCt	NoCt	NoCt	NoCt	NoCt	NoCt
AGM-51	L. mathura	Japan, Fujikawa	8597	1000	NoCt	NoCt	NoCt	NoCt	NoCt	NoCt
AGM-52	L. mathura	South Korea, Kangwon	54982	1000	NoCt	NoCt	NoCt	NoCt	NoCt	NoCt
AGM-54	L. mathura	China, Yunnan	165800	1000	NoCt	NoCt	NoCt	NoCt	NoCt	NoCt
CFIA-LEP097	L. mathura	South Korea	33214	1000	NoCt	NoCt	NoCt	NoCt	NoCt	NoCt
AGM-36	L. monacha	Japan, Nagano	14670	1000	NoCt	NoCt	NoCt	NoCt	NoCt	NoCt
AGM-67	L. monacha	Japan	8407	1000	NoCt	NoCt	NoCt	NoCt	NoCt	NoCt
CFS-14	L. monacha	Czech Republic	1028678	2000	NoCt	NoCt	NoCt	NoCt	NoCt	NoCt
AGM-68	L. lucescens	Japan, Nagano	15851	1000	NoCt	NoCt	NoCt	NoCt	NoCt	NoCt
CFIA-LEP093	L. lucescens	South Korea	11343	1000	NoCt	NoCt	NoCt	NoCt	NoCt	NoCt
CFIA-LEP094	L. lucescens	South Korea	10174	1000	NoCt	NoCt	NoCt	NoCt	NoCt	NoCt
AGM-47	L. fumida	USA, Newark	2253	1000	NoCt	NoCt	NoCt	NoCt	NoCt	NoCt
AGM-127	Cifuna locuples	China, Yunnan	56495	2621	NoCt	NoCt	NoCt	NoCt	NoCt	NoCt
AGM-132	Cifuna locuples	South Korea, Gwangyang	9620	2847	NoCt	NoCt	NoCt	NoCt	NoCt	NoCt
AGM-115	Calliteara pudibunda	Japan, Yamanachi	55486	1440	NoCt	NoCt	NoCt	NoCt	NoCt	NoCt
AGM-138	Arctornis l-nigurm	Japan, Nagano	48720	1243	NoCt	NoCt	NoCt	NoCt	NoCt	NoCt
AGM-139	Arctornis l-nigurm	South Korea, Gwangyang	135286	720	NoCt	NoCt	NoCt	NoCt	NoCt	NoCt
AGM-107	Calliteara abietis	Japan, Yamanachi	17028	1655	NoCt	NoCt	NoCt	NoCt	NoCt	NoCt
AGM-134	Orgyia thyellina	Japan, Okayama	800	800	NoCt	37.45	NoCt	NoCt	NoCt	NoCt	Contamination verified	2016-01-29
AGM-121	Euproctis similis	Japan, Nagano	3958	3958	NoCt	NoCt	NoCt	NoCt	NoCt	NoCt
AGM-42	L. xylina	Japan, Kimitsu	36119	1000	NoCt	NoCt	NoCt	NoCt	NoCt	NoCt
CFIA-LEP0253	L. xylina	Taiwan	456078	1000	NoCt	NoCt	NoCt	NoCt	NoCt	NoCt
CFIA-LEP0311	L. xylina	Japan	113497	1000	NoCt	NoCt	NoCt	NoCt	NoCt	NoCt
AGM-40	Lymantria minomonis	Japan, Nagano	55086	1000	NoCt	NoCt	NoCt	NoCt	NoCt	38.4	Contamination verified	2016-01-29
AGM-93	Leucoma salicis	Japan, Nagano	3068	3068	NoCt	NoCt	NoCt	NoCt	NoCt	NoCt
AGM-96	Leucoma salicis	China, Beijing	1926	1926	NoCt	NoCt	NoCt	NoCt	NoCt	NoCt
AGM-0164	Lymantria concolor	Thailand, Kanchanaburi	10157.9	1000	NoCt	NoCt	NoCt	NoCt	NoCt	NoCt
AGM-0170	Lymantria atemeles	Thailand, Phayao	6451.83	1000	NoCt	NoCt	NoCt	NoCt	NoCt	NoCt
AGM-71	Lymantria bantaizana	Japan, Nagano	3663	3663	NoCt	NoCt	NoCt	NoCt	NoCt	NoCt
	Ct set to 10% Fmax for detection
	Run 1 - 7500 Fast 2
	Run 2 - 7500 Fast 1
	Figure 1: Lymantria dispar disapr (Ldd) COI Taqman discrimination assay results (Applied Biosystems 7500 Fast). This assay amplifies L. dispar dispar while discriminating all other species on the priority list
	except for the AGM complex species (L. dispar asiatica, L. dispar japonica, L. umbrosa, L. albescens and L. postalba) which have already been positively identified. Forty-five cycles of qPCR were run and the Ft is set at 10% of Fmax.
	Table 2: Ldd COI primer and probe set. The forward primer has a degenerate base at position 8. The reverse primer has an ARMS base at position 3 to increase the discrimination for Lymantria lucescens and Lymantria obfuscata.
	Figure 2: Primer and probe alignment for the Ldd COI Taqman assay. An ARMs base was added to the reverse primer to increase discrimination for Lymantria lucescens and Lymantria obfuscata.

## Sheet: Duplex assay 4A&B
Table 1: Lymantria dispar dispar Asian Introgression FS1 Taqman discrimination assay results. This assay was run against the positive samples from the Ldd COI assay. The assay is designed to amplify a nuclear locus named FS1.
The primers are common for this assay, but the probes can discriminate between the PCR product associated with the common Asian gypsy moth populations and the common North American European gypsy moth populations.
					FS1-N		FS1-A
DNA sample ID	Species/Subspecies	Sampling Location	COI copy number - DNA extract	FS1 copy number - working DNA dilution	Run1-1	Run1-2	Run1-1	Run1-2	Result
CFS-6	L. dispar asiatica	China, Heilongjang	6257544	1000	No Ct	No Ct	29.11	29.07	FS1-A homozygous
CFS-8	L. dispar dispar	Russia, Siberia	4906088	1000	No Ct	No Ct	28.23	28.83	FS1-A homozygous
CFS-10	L. dispar dispar	Europe, Lithuania	6504376	1000	No Ct	No Ct	28.49	28.41	FS1-A homozygous
CFS-11	L. dispar dispar	Europe, Greece	6903386	1000	29.3	29.3	29.22	29	FS1-AN heterozygous
CFS-12	L. dispar dispar	USA, Conneticut	241535	1000	28.95	29.04	30.17	29.93	FS1-AN heterozygous
LEP0146	L. dispar dispar	Iran	6995	40	No Ct	No Ct	34.65	34.74	FS1-A homozygous
AGM-23	L. dispar dispar	Newark, USA	4776	200	29.21	29.28	No Ct	No Ct	FS1-N homozygous
AGM-22	L. dispar dispar	Canada, ON	31000	1000	27.18	26.94	No Ct	No Ct	FS1-N homozygous
AGM162	L. dispar dispar	Canada, BC	23244	1000	26.55	26.75	No Ct	No Ct	FS1-N homozygous
	The FS1 gene has appoximately 40X fewer copies than the COI gene therefore a 5-6 cycle shift should be expected when they are run together.
	Figure 1A : Ldd FS1 assay homozygous AGM (CFS6 China, CFS10 Lithuania, CFIA-LEP0146 Iran)			Figure 1B: Ldd FS1 assay heterozygous (Greece)
	Figure 1C: Ldd FS1 assay homozygous EGM (Ontario, Canada)
	Figure 1: Lymantria dispar dispar Asian Introgression FS1 Taqman discrimination assay results (Applied Biosystems 7500 Fast). This assay was run against the positive samples from the Ldd COI assay.
	The assay is designed to amplify a nuclear locus named FS1. Primers are common for this assay, but the probes can discriminate between the PCR product associated with the common Asian gypsy moth populations
	and the common North American European gypsy moth populations. Figures 1A, 1B and 1C illustrate the three possible outcomes of the assay. Figure 1A is a homozygous AGM result, 1B a heterozygous result
	and 1C is a homozygous EGM result. Forty-five cycles of qPCR were run and the Ft was set at 10% of Fmax.
	Table 2: Lymantria dispar dispar Asian Introgression FS1 primer and probe sets. The forward and reverse primers are common for both loci in the assay. L. dispar dispar North American EGM populations
	are discriminated from L. dispar dispar Asian populations carrying one or two copies of the AGM loci.
	Figure 2: Primer and probe alignments for the Lymantria dispar dispar Asian Introgression FS1 Taqman assay. The forward and reverse primers are common for both loci in the assay.
	L. dispar dispar North American EGM populations are discriminated from L. dispar dispar Asian populations with two different probes. The AGM probe is unique to the AGM sequence
	as it is placed within the 105bp insertion that is absent in the EGM sequence. The EGM probe was designed to span the 105bp insertion so it would only amplify the EGM sequence.

## Sheet: Duplex assay 5A
Table 1: Lymantria monacha COI Taqman discrimination assay results. This assay is designed to amplify Lymantria monacha while discriminating all other species on the priority list except for the AGM complex species
(L. dispar asiatica, L. dispar japonica, L. umbrosa, L. albescens and L. postalba) and L. dispar dispar species which have already been positively identified.
DNA sample ID	Species/Subspecies	Sampling Location	COI copy number - DNA extract	COI copy number - working DNA dilution	Run1-1	Run1-2	Run1-3	Run2-1	Run2-2	Run2-3	Comment
AGM-36	L. monacha	Japan, Nagano	14670	1000	24.95	24.99	25.17	24.86	24.82	24.97
AGM-37	L. monacha	South Korea	4435	1000	24.45	24.51	24.43	24.37	24.46	24.56
AGM-67	L. monacha	Japan	8407	1000	26.49	26.65	26.38	27.01	27.11	26.41
CFS-14	L. monacha	Czech Republic	1028678	2000	23.98	24.06	24.15	23.68	23.95	24.14
CFIA-LEP0341	L. monacha	China	52036	1000	27.16	27.17	26.78	26.97	26.97	26.87
AGM-2	L. mathura	Japan, Nagano	858862	1000	No Ct	No Ct	No Ct	No Ct	No Ct	No Ct
AGM-50	L. mathura	Japan, Nagano	187046	1000	No Ct	No Ct	No Ct	No Ct	No Ct	No Ct
AGM-52	L. mathura	South Korea, Kangwon	54982	1000	No Ct	No Ct	No Ct	No Ct	No Ct	No Ct
AGM-54	L. mathura	China, Yunnan	165800	1000	No Ct	No Ct	No Ct	No Ct	No Ct	No Ct
AGM-59	L. mathura	Tibet	7519	1000	No Ct	No Ct	No Ct	No Ct	No Ct	No Ct
CFIA-LEP097	L. mathura	South Korea	33214	1000	No Ct	No Ct	No Ct	No Ct	No Ct	No Ct
AGM-68	L. lucescens	Japan, Nagano	15851	1000	No Ct	No Ct	No Ct	No Ct	No Ct	No Ct
CFIA-LEP093	L. lucescens	South Korea	11343	1000	No Ct	No Ct	No Ct	No Ct	No Ct	No Ct
CFIA-LEP094	L. lucescens	South Korea	10174	1000	No Ct	No Ct	No Ct	No Ct	No Ct	No Ct
AGM-47	L. fumida	USA, Newark	2253	1000	No Ct	No Ct	No Ct	No Ct	No Ct	No Ct
AGM-127	Cifuna locuples	China, Yunnan	56495	2621	No Ct	No Ct	No Ct	No Ct	No Ct	No Ct
AGM-132	Cifuna locuples	South Korea, Gwangyang	9620	2847	No Ct	No Ct	No Ct	No Ct	No Ct	No Ct
AGM-115	Calliteara pudibunda	Japan, Yamanachi	55486	1440	No Ct	No Ct	No Ct	No Ct	No Ct	No Ct
AGM-138	Arctornis l-nigurm	Japan, Nagano	48720	1243	No Ct	No Ct	No Ct	No Ct	No Ct	No Ct
AGM-139	Arctornis l-nigurm	South Korea, Gwangyang	135286	720	No Ct	No Ct	No Ct	No Ct	No Ct	No Ct
AGM-107	Calliteara abietis	Japan, Yamanachi	17028	1655	No Ct	No Ct	No Ct	No Ct	No Ct	No Ct
AGM-134	Orgyia thyellina	Japan, Okayama	800	800	No Ct	No Ct	No Ct	No Ct	No Ct	No Ct
AGM-121	Euproctis similis	Japan, Nagano	3958	3958	No Ct	No Ct	No Ct	No Ct	No Ct	No Ct
CFIA-LEP0253	L. xylina	Taiwan	456078	1000	No Ct	No Ct	No Ct	No Ct	No Ct	No Ct
CFIA-LEP0311	L. xylina	Japan	113497	1000	No Ct	No Ct	No Ct	No Ct	No Ct	No Ct
AGM-40	Lymantria minomonis	Japan, Nagano	55086	1000	No Ct	No Ct	No Ct	No Ct	No Ct	No Ct
AGM-93	Leucoma salicis	Japan, Nagano	3068	3068	No Ct	No Ct	No Ct	No Ct	No Ct	No Ct
AGM-96	Leucoma salicis	China, Beijing	1926	1926	No Ct	No Ct	No Ct	No Ct	No Ct	No Ct
AGM-0164	Lymantria concolor	Thailand, Kanchanaburi	10157.9	1000	No Ct	No Ct	No Ct	No Ct	No Ct	No Ct
AGM-0170	Lymantria atemeles	Thailand, Phayao	6451.83	1000	No Ct	No Ct	No Ct	No Ct	No Ct	No Ct
AGM-71	Lymantria bantaizana	Japan, Nagano	3663	3663	No Ct	No Ct	No Ct	No Ct	No Ct	No Ct
	Ct set to 10% Fmax for detection
	Run1-7500 Fast1
	Run2-7500 Fast2
	Figure 1: Lymantria monacha COI Taqman discrimination assay results (Applied Biosystems 7500 Fast). This assay amplifies Lymantria monacha while discriminating all other species on the priority list except for the AGM complex species
	(L. dispar asiatica, L. dispar japonica, L. umbrosa, L. albescens and L. postalba) and L. dispar dispar which have already been positively identified. Forty-five cycles of qPCR were run and the Ft is set at 10% of Fmax.
	Table 2: Lymantria monacha COI primer and probe set. There is good discrimination with the reverse primer and the LNA probe for this assay.
	Figure 2: Primer and probe alignment for the Lymantria monacha COI Taqman assay. There is good discrimination with the reverse primer and LNA probe (red letters designate LNA bases) for this assay.

## Sheet: Duplex assay 5B
Table 1: Lymantria fumida COI Taqman discrimination assay results. This assay is designed to amplify Lymantria fumida while discriminating all other species on the priority list except for the AGM complex species
(L. dispar asiatica, L. dispar japonica, L. umbrosa, L. albescens and L. postalba) and L. dispar dispar species which have already been positively identified.
DNA sample ID	Species/Subspecies	Sampling Location	COI copy number - DNA extract	COI copy number - working DNA dilution	Run1-1	Run1-2	Run1-3	Run2-1	Run2-2	Run2-3	Comment
AGM-47	L. fumida	USA, Newark	2253	1000	26.61	26.79	26.77	26.57	26.77	26.75
AGM-2	L. mathura	Japan, Nagano	858862	1000	NoCt	NoCt	NoCt	NoCt	NoCt	NoCt
AGM-50	L. mathura	Japan, Nagano	187046	1000	NoCt	NoCt	NoCt	NoCt	NoCt	NoCt
AGM-51	L. mathura	Japan, Fujikawa	8597	1000	NoCt	NoCt	NoCt	NoCt	NoCt	NoCt
AGM-52	L. mathura	South Korea, Kangwon	54982	1000	NoCt	NoCt	NoCt	NoCt	NoCt	NoCt
AGM-54	L. mathura	China, Yunnan	165800	1000	NoCt	NoCt	NoCt	NoCt	NoCt	NoCt
AGM-36	L. monacha	Japan, Nagano	14670	1000	NoCt	NoCt	NoCt	NoCt	NoCt	NoCt
CFS-14	L. monacha	Czech Republic	1028678	2000	NoCt	NoCt	NoCt	NoCt	NoCt	NoCt
AGM-68	L. lucescens	Japan, Nagano	15851	1000	NoCt	NoCt	NoCt	NoCt	NoCt	NoCt
AGM-127	Cifuna locuples	China, Yunnan	56495	2621	NoCt	NoCt	NoCt	NoCt	NoCt	NoCt
AGM-132	Cifuna locuples	South Korea, Gwangyang	9620	2847	NoCt	NoCt	NoCt	NoCt	NoCt	NoCt
AGM-115	Calliteara pudibunda	Japan, Yamanachi	55486	1440	NoCt	NoCt	NoCt	NoCt	NoCt	NoCt
AGM-138	Arctornis l-nigurm	Japan, Nagano	48720	1243	NoCt	NoCt	NoCt	NoCt	NoCt	NoCt
AGM-139	Arctornis l-nigurm	South Korea, Gwangyang	135286	720	NoCt	NoCt	NoCt	NoCt	NoCt	NoCt
AGM-107	Calliteara abietis	Japan, Yamanachi	17028	1655	NoCt	NoCt	NoCt	NoCt	NoCt	NoCt
AGM-134	Orgyia thyellina	Japan, Okayama	440	440	NoCt	NoCt	NoCt	NoCt	NoCt	NoCt
AGM-121	Euproctis similis	Japan, Nagano	3958	3958	NoCt	NoCt	NoCt	NoCt	NoCt	NoCt
AGM-42	Lymantria xylina	Japan, Kimitsu	36119	1000	NoCt	NoCt	NoCt	NoCt	NoCt	NoCt
AGM-40	Lymantria minomonis	Japan, Nagano	55086	1000	NoCt	NoCt	NoCt	NoCt	NoCt	NoCt
AGM-90	Leucoma salicis	Canada, BC	2366	2366	NoCt	NoCt	NoCt	NoCt	NoCt	NoCt
AGM-93	Leucoma salicis	Japan, Nagano	3068	3068	NoCt	NoCt	NoCt	NoCt	NoCt	NoCt
AGM-96	Leucoma salicis	China, Beijing	1926	1926	NoCt	NoCt	NoCt	NoCt	NoCt	NoCt
AGM-0164	Lymantria concolor	Thailand, Kanchanaburi	10157.9	1000	NoCt	NoCt	NoCt	NoCt	NoCt	NoCt
AGM-0170	Lymantria atemeles	Thailand, Phayao	6451.83	1000	NoCt	NoCt	NoCt	NoCt	NoCt	NoCt
AGM-71	Lymantria bantaizana	Japan, Nagano	3663	3663	NoCt	NoCt	NoCt	38.31	NoCt	NoCt	L. fumida contamination confirmed 2dec15
	Ct set to 10% Fmax for detection
	Run1-7500 Fast1
	Run2-7500 Fast2
	Figure 1: Lymantria fumida COI Taqman discrimination assay results (Applied Biosystems 7500 Fast). This assay amplifies Lymantria fumida while discriminating all other species on the priority list except for the AGM complex species
	(L. dispar asiatica, L. dispar japonica, L. umbrosa, L. albescens and L. postalba) and L. dispar dispar which have already been positively identified. Forty-five cycles of qPCR were run and the Ft is set at 10% of Fmax.
	Table 2: Lymantria fumida COI primer and probe set. There is good discrimination with both primers and probe for this assay.
	Figure 2: Primer and probe alignment for the Lymantria fumida COI Taqman assay. There is good discrimination with both primers and probe for this assay.

## Sheet: Triplex assay 6A
Table 1: Lymantria mathura COI Taqman discrimination assay results. This assay is designed to amplify Lymantria mathura while discriminating all other species on the priority list except for the AGM complex species
(L. dispar asiatica, L. dispar japonica, L. umbrosa, L. albescens and L. postalba) and L. dispar dispar species which have already been positively identified.
DNA sample ID	Species/Subspecies	Sampling Location	COI copy number - DNA extract	COI copy number - working DNA dilution	Run1-1	Run1-2	Run1-3	Run2-1	Run2-2	Run2-3	Comment
AGM-2	L. mathura	Japan, Nagano	858862	1000	27.6	27.83	27.54	27.72	27.69	27.77
AGM-50	L. mathura	Japan, Nagano	187046	1000	25.51	25.75	25.61	25.16	25.26	25.12
AGM-51	L. mathura	Japan, Fujikawa	8597	1000	25.97	26.1	26.12	25.86	25.77	25.78
AGM-52	L. mathura	South Korea, Kangwon	54982	1000	25.51	25.25	25.37	25.36	25.42	25.29
AGM-54	L. mathura	China, Yunnan	165800	1000	25.98	26.05	25.92	26.09	25.96	26.13
AGM-59	L. mathura	Tibet	7519	1000	27.85	27.8	27.69	27.29	27.86	27.81
CFIA-LEP097	L. mathura	South Korea	33214	1000	27.15	27.03	27.26	27.12	27.06	26.96
AGM-36	L. monacha	Japan, Nagano	14670	1000	No Ct	No Ct	No Ct	No Ct	No Ct	No Ct
AGM-37	L. monacha	South Korea	4435	1000	No Ct	No Ct	No Ct	No Ct	No Ct	No Ct
AGM-67	L. monacha	Japan	8407	1000	No Ct	No Ct	No Ct	No Ct	No Ct	No Ct
CFS-14	L. monacha	Czech Republic	1028678	2000	No Ct	No Ct	No Ct	No Ct	No Ct	No Ct
CFIA-LEP0341	L. monacha	China	52036	1000	No Ct	No Ct	No Ct	No Ct	No Ct	No Ct
AGM-68	L. lucescens	Japan, Nagano	15851	1000	No Ct	No Ct	No Ct	No Ct	No Ct	No Ct
CFIA-LEP093	L. lucescens	South Korea	11343	1000	No Ct	No Ct	No Ct	No Ct	No Ct	No Ct
CFIA-LEP094	L. lucescens	South Korea	10174	1000	No Ct	No Ct	No Ct	No Ct	No Ct	No Ct
AGM-47	L. fumida	USA, Newark	2253	1000	No Ct	No Ct	No Ct	No Ct	No Ct	No Ct
AGM-127	Cifuna locuples	China, Yunnan	56495	2621	No Ct	No Ct	No Ct	No Ct	No Ct	No Ct
AGM-132	Cifuna locuples	South Korea, Gwangyang	9620	2847	No Ct	No Ct	No Ct	No Ct	No Ct	No Ct
AGM-115	Calliteara pudibunda	Japan, Yamanachi	55486	1440	No Ct	No Ct	No Ct	No Ct	No Ct	No Ct
AGM-138	Arctornis l-nigurm	Japan, Nagano	48720	1243	No Ct	No Ct	No Ct	No Ct	No Ct	No Ct
AGM-139	Arctornis l-nigurm	South Korea, Gwangyang	135286	720	No Ct	No Ct	No Ct	No Ct	No Ct	No Ct
AGM-107	Calliteara abietis	Japan, Yamanachi	17028	1655	No Ct	No Ct	No Ct	No Ct	No Ct	No Ct
AGM-134	Orgyia thyellina	Japan, Okayama	800	800	No Ct	No Ct	No Ct	No Ct	No Ct	No Ct
AGM-121	Euproctis similis	Japan, Nagano	3958	3958	No Ct	No Ct	No Ct	No Ct	No Ct	No Ct
AGM-42	L. xylina	Japan, Kimitsu	36119	1000	No Ct	No Ct	No Ct	No Ct	No Ct	No Ct
CFIA-LEP0253	L. xylina	Taiwan	456078	1000	No Ct	No Ct	No Ct	No Ct	No Ct	No Ct
CFIA-LEP0311	L. xylina	Japan	113497	1000	No Ct	No Ct	No Ct	No Ct	No Ct	No Ct
AGM-40	Lymantria minomonis	Japan, Nagano	55086	1000	No Ct	No Ct	No Ct	No Ct	No Ct	No Ct
AGM-93	Leucoma salicis	Japan, Nagano	3068	3068	No Ct	No Ct	No Ct	No Ct	No Ct	No Ct
AGM-96	Leucoma salicis	China, Beijing	1926	1926	No Ct	No Ct	No Ct	No Ct	No Ct	No Ct
AGM-0164	Lymantria concolor	Thailand, Kanchanaburi	10157.9	1000	No Ct	No Ct	No Ct	No Ct	No Ct	No Ct
AGM-0170	Lymantria atemeles	Thailand, Phayao	6451.83	1000	No Ct	No Ct	No Ct	No Ct	No Ct	No Ct
AGM-71	Lymantria bantaizana	Japan, Nagano	3663	3663	No Ct	No Ct	No Ct	No Ct	No Ct	No Ct
	Ct set to 10% Fmax for detection
	Run1-7500 Fast2
	Run2-7500 Fast2
	Figure 1: Lymantria mathura COI Taqman discrimination assay results (Applied Biosystems 7500 Fast). This assay amplifies Lymantria mathura while discriminating all other species on the priority list except for the AGM complex species
	(L. dispar asiatica, L. dispar japonica, L. umbrosa, L. albescens and L. postalba) and L. dispar dispar which have already been positively identified. Forty-five cycles of qPCR were run and the Ft is set at 10% of Fmax.
	Table 2: Lymantria mathura COI primer and probe set. There is good discrimination with both primers for this assay. The forward primer has two degenerate bases to ensure that the Chinese and Tibetan L. mathura species amplify efficiently.
	Figure 2: Primer and probe alignment for the Lymantria mathura COI Taqman assay. There is good discrimination with both primers for this assay.

[truncated: 2 more sheets: Triplex assay 6B, Triplex assay 6C]
