# Supplementary material for: A Multi-Species TaqMan PCR Assay for the Identification of Asian Gypsy Moths (Lymantria spp.) and Other Invasive Lymantriines of Biosecurity Concern to North America
Source: PLoS One. 2016 Aug 11;11(8):e0160878. doi: 10.1371/journal.pone.0160878 (PMC4981461; doi:10.1371/journal.pone.0160878)
Supplement: S1 Table — (XLSX) [file pone.0160878.s003.xlsx]

## Sheet: DNA sequence id
Species	Specimen ID	Country	Prefecture/Province/City/Region	Reference	COI-5P Genbank ID	COI-5P BOLD ID	COI-3P Genbank ID	FS1 Genbank ID
AGM complex
Lymantria albescens	-	Japan	Okinawa	Bogdanowicz et al. 2000	AF075274	-	-	-
Lymantria albescens	AGM05	Japan	Ishigaki, Okinawa (Ishigaki Island)	This study	KX436533	-	KX436218	-
Lymantria albescens	AGM06	Japan	Taketomi, Okinawa (Iriomote Island)	This study	KX436534	-	-	-
Lymantria albescens	AGM07	Japan	Itoman, Okinawa	This study	KX436535	-	KX436219	-
Lymantria albescens	AGM10	Japan	Nichinan, Miyazaki	This study	KX436596	-	-	-
Lymantria albescens	AGM11	Japan	Kushima, Miyazaki	This study	KX436536	-	KX436221	-
Lymantria albescens	AGM13	Japan	Yakushima Island, Kagoshima	This study	KX436597	-	-	-
Lymantria albescens	AGM14	Japan	Yakushima Island, Kagoshima	This study	KX436598	-	KX436222	-
Lymantria albescens	AGM565	Japan	Okinawa-jima Is.	This study	KX555663	-	-	-
Lymantria albescens	AGM566	Japan	Okinawa-jima Is.	This study	KX555664	-	-	-
Lymantria albescens	AGM604	Japan	Ishigaki-jima Is.	This study	KX555665	-	-	-
Lymantria albescens	Bogda-JA11-65	Japan	Okinawa	Bogdanowicz et al. 2000	-	BOGDA065-08	-	-
Lymantria albescens	CFIA-LEP0235	Japan	Mt. Sibi, Satsumacho, Kagoshima Prefecture	This study	KX436281	MPGM141-15	-	-
Lymantria albescens	CFIA-LEP0236	Japan	Shiroyama, Kagoshima city	This study	KX436282	MPGM142-15	-	-
Lymantria albescens	CFIA-LEP0238	Japan	Shiroyama, Kagoshima city	This study	KX436284	MPGM144-15	-	-
Lymantria albescens	CFIA-LEP0239	Japan	Manpa, Nishinoomote, Kagoshima	This study	KX436285	MPGM145-15	-	-
Lymantria albescens	CFIA-LEP0246	Japan	Yakushima Island, Kagoshima Prefecture, Yakushima-cho, Onoaida	This study	KX436292	MPGM152-15	-	-
Lymantria albescens	CFIA-LEP0247	Japan	Yakushima Island, Kagoshima Prefecture, Yakushima-cho, Onoaida	This study	KX436293	MPGM153-15	-	-
Lymantria albescens	CFIA-LEP0305	Japan	Kami-agata, Tsushima Is.	This study	KX436384	MPGM305-15	-	-
Lymantria albescens	CFIA-LEP0306	Japan	Ryukyus, Ishigakijima Is., Mt. Kuuradake	This study	KX436385	MPGM306-15	-	-
Lymantria albescens	CFIA-LEP0307	Japan	Okinawa-naka	This study	KX436386	MPGM307-15	-	-
Lymantria albescens	ww01229	Japan	Okinawa	de Waard et al 2010	HM775520	-	-	-
Lymantria albescens	ww01230	Japan	Okinawa	de Waard et al 2010	HM775519	-	-	-
Lymantria albescens	ww01231	Japan	Okinawa	de Waard et al 2010	HM775518	-	-	-
Lymantria albescens	ww01232	Japan	Okinawa	de Waard et al 2010	HM775517	-	-	-
Lymantria albescens	ww01233	Japan	Okinawa	de Waard et al 2010	HM775516	-	-	-
Lymantria albescens	ww01234	Japan	Okinawa	de Waard et al 2010	HM775515	-	-	-
Lymantria albescens	ww01235	Japan	Okinawa	de Waard et al 2010	HM775514	-	-	-
Lymantria albescens	ww01236	Japan	Okinawa	de Waard et al 2010	HM775513	-	-	-
Lymantria albescens	ww01237	Japan	Okinawa	de Waard et al 2010	HM775512	-	-	-
Lymantria albescens	ww01274	Japan	Okinawa	de Waard et al 2010	HM775511	-	-	-
Lymantria albescens	ww01275	Japan	Okinawa	de Waard et al 2010	HM775510	-	-	-
Lymantria postalba	AGM501	Japan	Shikoku	This study	KX555657	-	-	-
Lymantria postalba	AGM502	Japan	Shikoku	This study	KX555658	-	-	-
Lymantria postalba	AGM521	Japan	Kyusyu	This study	KX555659	-	-	-
Lymantria postalba	AGM526	Japan	Kyusyu	This study	KX555660	-	-	-
Lymantria postalba	AGM527	Japan	Kyusyu	This study	KX555661	-	-	-
Lymantria postalba	AGM529	Japan	Tanega-shima Is.	This study	KX555662	-	-	-
Lymantria dispar asiatica	AGM09	Russia	-	This study	KX436538	-	KX436220	-
Lymantria dispar asiatica	AGM18	South Korea	Kangwon	This study	KX436539	-	KX436226	-
Lymantria dispar asiatica	AGM19	South Korea	Kangwon	This study	KX436540	-	KX436227	-
Lymantria dispar asiatica	AGM24	Russia	Primorsky Kray	This study	KX436541	-	KX436229	-
Lymantria dispar asiatica	AGM25	Russia	Vladivostok	This study	KX436542	-	KX436230	-
Lymantria dispar asiatica	AGM26	South Korea	Kangwon	This study	KX436543	-	KX436231	-
Lymantria dispar asiatica	AGM27	South Korea	Kangwon	This study	KX436544	-	KX436232	-
Lymantria dispar asiatica	Bogda-CH1-28	China	Heilongjiang Sheng	Bogdanowicz et al. 2000	-	BOGDA028-08	-	-
Lymantria dispar asiatica	Bogda-CH1-29	China	Heilongjiang Sheng	Bogdanowicz et al. 2000	-	BOGDA029-08	-	-
Lymantria dispar asiatica	Bogda-CH2-30	China	Liaoning	Bogdanowicz et al. 2000	-	BOGDA030-08	-	-
Lymantria dispar asiatica	Bogda-CH2-31	China	Liaoning	Bogdanowicz et al. 2000	-	BOGDA031-08	-	-
Lymantria dispar asiatica	Bogda-CH3-32	China	Hebei	Bogdanowicz et al. 2000	-	BOGDA032-08	-	-
Lymantria dispar asiatica	Bogda-CH3-33	China	Hebei	Bogdanowicz et al. 2000	-	BOGDA033-08	-	-
Lymantria dispar asiatica	Bogda-CH4-34	China	Beijing Shi	Bogdanowicz et al. 2000	-	BOGDA034-08	-	-
Lymantria dispar asiatica	Bogda-CH4-35	China	Beijing Shi	Bogdanowicz et al. 2000	-	BOGDA035-08	-	-
Lymantria dispar asiatica	Bogda-KOR-36	South Korea	Seoul	Bogdanowicz et al. 2000	-	BOGDA036-08	-	-
Lymantria dispar asiatica	Bogda-KOR-37	South Korea	Seoul	Bogdanowicz et al. 2000	-	BOGDA037-08	-	-
Lymantria dispar asiatica	Bogda-RA2-16	Russia	Irkutskaya Oblast'	Bogdanowicz et al. 2000	-	BOGDA016-08	-	-
Lymantria dispar asiatica	Bogda-RA2-17	Russia	Irkutskaya Oblast'	Bogdanowicz et al. 2000	-	BOGDA017-08	-	-
Lymantria dispar asiatica	Bogda-RA3-18	Russia	Primorskiy Kray	Bogdanowicz et al. 2000	-	BOGDA018-08	-	-
Lymantria dispar asiatica	Bogda-RA3-19	Russia	Primorskiy Kray	Bogdanowicz et al. 2000	-	BOGDA019-08	-	-
Lymantria dispar asiatica	Bogda-RA3-20	Russia	Primorskiy Kray	Bogdanowicz et al. 2000	-	BOGDA020-08	-	-
Lymantria dispar asiatica	Bogda-RA3-21	Russia	Primorskiy Kray	Bogdanowicz et al. 2000	-	BOGDA021-08	-	-
Lymantria dispar asiatica	Bogda-RA3-22	Russia	Primorskiy Kray	Bogdanowicz et al. 2000	-	BOGDA022-08	-	-
Lymantria dispar asiatica	Bogda-RA3-23	Russia	Primorskiy Kray	Bogdanowicz et al. 2000	-	BOGDA023-08	-	-
Lymantria dispar asiatica	Bogda-RA3-24	Russia	Primorskiy Kray	Bogdanowicz et al. 2000	-	BOGDA024-08	-	-
Lymantria dispar asiatica	Bogda-RA3-25	Russia	Primorskiy Kray	Bogdanowicz et al. 2000	-	BOGDA025-08	-	-
Lymantria dispar asiatica	Bogda-RA4-26	Russia	Khabarovskiy Kray	Bogdanowicz et al. 2000	-	BOGDA026-08	-	-
Lymantria dispar asiatica	Bogda-RA4-27	Russia	Khabarovskiy Kray	Bogdanowicz et al. 2000	-	BOGDA027-08	-	-
Lymantria dispar asiatica	CFS3	China	Tianjin	This study	KX436545	-	KX436207	-
Lymantria dispar asiatica	CFS4	Mongolia	-	This study	KX436546	-	KX436208	-
Lymantria dispar asiatica	CFS5	China	Beijing	This study	KX436547	-	KX436209	-
Lymantria dispar asiatica	CFS6	China	Harbin, Heilongjiang	This study	KX436548	-	KX436210	-
Lymantria dispar asiatica	CFS7	China	Liaoning	This study	KX436549	-	KX436211	-
Lymantria dispar asiatica	CFS9	Russia	Far East	This study	KX436551	-	KX436213	-
Lymantria dispar asiatica	FS1-SX120330-011	Japan	-	Islam et al. 2015	-	-	-	KM401986
Lymantria dispar asiatica	FS1-SX120330-012	Japan	-	Islam et al. 2015	-	-	-	KM401987
Lymantria dispar asiatica	FS1-SX120330-014	Japan	-	Islam et al. 2015	-	-	-	KM401988
Lymantria dispar asiatica	FS1-SX120330-015	Japan	-	Islam et al. 2015	-	-	-	KM401989
Lymantria dispar asiatica	FS1-SX120330-016	Japan	-	Islam et al. 2015	-	-	-	KM401990
Lymantria dispar asiatica	FS1-SX120330-018	Japan	-	Islam et al. 2015	-	-	-	KM401991
Lymantria dispar asiatica	FS1-SX120330-019	Japan	-	Islam et al. 2015	-	-	-	KM401992
Lymantria dispar asiatica	FS1-SX120330-020	Japan	-	Islam et al. 2015	-	-	-	KM401993
Lymantria dispar asiatica	FS1-SX120330-021	China	-	Islam et al. 2015	-	-	-	KM401994
Lymantria dispar asiatica	FS1-SX120330-022	China	-	Islam et al. 2015	-	-	-	KM401999
Lymantria dispar asiatica	FS1-SX120330-023	China	-	Islam et al. 2015	-	-	-	KM401995
Lymantria dispar asiatica	FS1-SX120330-024	China	-	Islam et al. 2015	-	-	-	KM402000
Lymantria dispar asiatica	FS1-SX120330-025	China	-	Islam et al. 2015	-	-	-	KM401996
Lymantria dispar asiatica	FS1-SX120330-026	China	-	Islam et al. 2015	-	-	-	KM401997
Lymantria dispar asiatica	FS1-SX120330-027	China	-	Islam et al. 2015	-	-	-	KM401998
Lymantria dispar asiatica	FS1-SX120330-028	China	-	Islam et al. 2015	-	-	-	KM402001
Lymantria dispar asiatica	FS1-SX120524-003	South Korea	-	Islam et al. 2015	-	-	-	KM402002
Lymantria dispar asiatica	FS1-SX120524-004	South Korea	-	Islam et al. 2015	-	-	-	KM402003
Lymantria dispar asiatica	FS1-SX120524-005	South Korea	-	Islam et al. 2015	-	-	-	KM402004
Lymantria dispar asiatica	FS1-SX120524-007	South Korea	-	Islam et al. 2015	-	-	-	KM402005
Lymantria dispar asiatica	FS1-SX120524-009	South Korea	-	Islam et al. 2015	-	-	-	KM402006
Lymantria dispar asiatica	FS1-SX120524-010	South Korea	-	Islam et al. 2015	-	-	-	KM402007
Lymantria dispar asiatica	FS1-SX120524-011	South Korea	-	Islam et al. 2015	-	-	-	KM402008
Lymantria dispar asiatica	FS1-SX120524-012	South Korea	-	Islam et al. 2015	-	-	-	KM402009
Lymantria dispar asiatica	FS1-SX120524-013	South Korea	-	Islam et al. 2015	-	-	-	KM402010
Lymantria dispar asiatica	FS1-SX120524-015	Mongolia	-	Islam et al. 2015	-	-	-	KM402011
Lymantria dispar asiatica	FS1-SX120524-016	Mongolia	-	Islam et al. 2015	-	-	-	KM402012
Lymantria dispar asiatica	FS1-SX120524-017	Mongolia	-	Islam et al. 2015	-	-	-	KM402013
Lymantria dispar asiatica	FS1-SX120524-018	Mongolia	-	Islam et al. 2015	-	-	-	KM402014
Lymantria dispar asiatica	FS1-SX120524-021	Mongolia	-	Islam et al. 2015	-	-	-	KM402015
Lymantria dispar asiatica	FS1-SX120524-022	Mongolia	-	Islam et al. 2015	-	-	-	KM402016
Lymantria dispar asiatica	FS1-SX120524-023	Mongolia	-	Islam et al. 2015	-	-	-	KM402017
Lymantria dispar asiatica	FS1-SX120524-024	Mongolia	-	Islam et al. 2015	-	-	-	KM402018
Lymantria dispar asiatica	GP2	Russia	Sakhalinskaya Oblast	Armstrong and Ball 2005	DQ116107	-	-	-
Lymantria dispar asiatica	Ly1L	Russia	Sakhalinskaya Oblast	Armstrong and Ball 2005	DQ116106	-	-	-
Lymantria dispar asiatica	Ly218	South Korea	Wontong	Armstrong and Ball 2005	DQ116150	-	-	-
Lymantria dispar asiatica	Ly219	South Korea	Wontong	Armstrong and Ball 2005	DQ116151	-	-	-
Lymantria dispar asiatica	Ly220	South Korea	Wontong	Armstrong and Ball 2005	DQ116152	-	-	-
Lymantria dispar asiatica	Ly222	South Korea	Wontong	Armstrong and Ball 2005	DQ116169	-	-	-
Lymantria dispar asiatica	LymMk_AA-1	Canada	British Columbia	de Waard et al 2010	HM775695	-	-	-
Lymantria dispar asiatica	LymMk_AA-2	Canada	British Columbia	de Waard et al 2010	HM775694	-	-	-
Lymantria dispar asiatica	LymMk_CB-1	China	Beijing Shi	de Waard et al 2010	HM775692	-	-	-
Lymantria dispar asiatica	LymMk_CB-2	China	Beijing Shi	de Waard et al 2010	HM775691	-	-	-
Lymantria dispar asiatica	LymMk_CB-3	China	Beijing Shi	de Waard et al 2010	HM775690	-	-	-
Lymantria dispar asiatica	LymMk_CH-1	China	Hebei	de Waard et al 2010	HM775689	-	-	-
Lymantria dispar asiatica	LymMk_CH-2	China	Hebei	de Waard et al 2010	HM775688	-	-	-
Lymantria dispar asiatica	LymMk_CH-3	China	Hebei	de Waard et al 2010	HM775687	-	-	-
Lymantria dispar asiatica	LymMk_CL-1	China	Liaoning	de Waard et al 2010	HM775686	-	-	-
Lymantria dispar asiatica	LymMk_CL-2	China	Liaoning	de Waard et al 2010	HM775608	-	-	-
Lymantria dispar asiatica	LymMk_CL-3	China	Liaoning	de Waard et al 2010	HM775607	-	-	-
Lymantria dispar asiatica	LymMk_CS-1	China	Shandong	de Waard et al 2010	HM775685	-	-	-
Lymantria dispar asiatica	LymMk_CS-2	China	Shandong	de Waard et al 2010	HM775605	-	-	-
Lymantria dispar asiatica	LymMk_CS-3	China	Shandong	de Waard et al 2010	HM775684	-	-	-
Lymantria dispar asiatica	LymMk_RM-1	Russia	Primorskiy Kray	de Waard et al 2010	HM775584	-	-	-
Lymantria dispar asiatica	LymMk_RM-2	Russia	Primorskiy Kray	de Waard et al 2010	HM775583	-	-	-
Lymantria dispar asiatica	LymMk_RM-3	Russia	Primorskiy Kray	de Waard et al 2010	HM775582	-	-	-
Lymantria dispar asiatica	PaA-08-552	Russia	Primorskiy Kray	de Waard et al 2010	HM775618	-	-	-
Lymantria dispar asiatica	PaA-08-553	Russia	Primorskiy Kray	de Waard et al 2010	HM775617	-	-	-
Lymantria dispar asiatica	PaA-08-554	Russia	Primorskiy Kray	de Waard et al 2010	HM775616	-	-	-
Lymantria dispar asiatica	PaA-08-555	Russia	Primorskiy Kray	de Waard et al 2010	HM775615	-	-	-
Lymantria dispar asiatica	PaA-08-556	Russia	Primorskiy Kray	de Waard et al 2010	HM775614	-	-	-
Lymantria dispar asiatica	ww01209	Mongolia	Ulaanba-atar	de Waard et al 2010	HM775708	-	-	-
Lymantria dispar asiatica	ww01210	Mongolia	Ulaanba-atar	de Waard et al 2010	HM775707	-	-	-
Lymantria dispar asiatica	ww01211	China	Liaoning	de Waard et al 2010	HM775706	-	-	-
Lymantria dispar asiatica	ww01212	China	Liaoning	de Waard et al 2010	HM775705	-	-	-
Lymantria dispar japonica	AGM01	Japan	Utsukushigahara, Nagano	This study	KX436601	-	KX436217	-
Lymantria dispar japonica	AGM15	Japan	Matsumoto, Nagano	This study	KX436558	-	KX436223	-
Lymantria dispar japonica	AGM16	Japan	Kimitsu, Chiba	This study	KX436559	-	KX436224	-
Lymantria dispar japonica	AGM17	Japan	Kimitsu, Chiba	This study	KX436560	-	KX436225	-
Lymantria dispar japonica	AGM29	Japan	Matsumoto, Nagano	This study	KX436561	-	KX436233	-
Lymantria dispar japonica	AGM30	Japan	Takizawa, Iwate	This study	KX436562	-	KX436234	-
Lymantria dispar japonica	AGM31	Japan	Mt. Kushigata, Fujikawa, Yamanashi	This study	KX436563	-	KX436235	-
Lymantria dispar japonica	AGM32	Japan	Matsumoto, Nagano	This study	KX436564	-	KX436236	-
Lymantria dispar japonica	AGM33	Japan	Mt. Kushigata, Fujikawa, Yamanashi	This study	KX436565	-	KX436237	-
Lymantria dispar japonica	AGM34	Japan	Kimitsu, Chiba	This study	KX436566	-	KX436238	-
Lymantria dispar japonica	Bogda-JA1-38	Japan	Kyushu-chiho	Bogdanowicz et al. 2000	-	BOGDA038-08	-	-
Lymantria dispar japonica	Bogda-JA1-39	Japan	Kyushu-chiho	Bogdanowicz et al. 2000	-	BOGDA039-08	-	-
Lymantria dispar japonica	Bogda-JA2-40	Japan	Kyushu-chiho	Bogdanowicz et al. 2000	-	BOGDA040-08	-	-
Lymantria dispar japonica	Bogda-JA2-41	Japan	Kyushu-chiho	Bogdanowicz et al. 2000	-	BOGDA041-08	-	-
Lymantria dispar japonica	Bogda-JA3-42	Japan	Honshu	Bogdanowicz et al. 2000	-	BOGDA042-08	-	-
Lymantria dispar japonica	Bogda-JA4-43	Japan	Honshu	Bogdanowicz et al. 2000	-	BOGDA043-08	-	-
Lymantria dispar japonica	Bogda-JA4-44	Japan	Honshu	Bogdanowicz et al. 2000	-	BOGDA044-08	-	-
Lymantria dispar japonica	Bogda-JA6-52	Japan	Honshu	Bogdanowicz et al. 2000	-	BOGDA052-08	-	-
Lymantria dispar japonica	Bogda-JA6-53	Japan	Honshu	Bogdanowicz et al. 2000	-	BOGDA053-08	-	-
Lymantria dispar japonica	Bogda-JA7-54	Japan	Honshu	Bogdanowicz et al. 2000	-	BOGDA054-08	-	-
Lymantria dispar japonica	Bogda-JA8-55	Japan	Honshu	Bogdanowicz et al. 2000	-	BOGDA055-08	-	-
Lymantria dispar japonica	Bogda-JA8-56	Japan	Honshu	Bogdanowicz et al. 2000	-	BOGDA056-08	-	-
Lymantria dispar japonica	Bogda-JA9-57	Japan	Honshu	Bogdanowicz et al. 2000	-	BOGDA057-08	-	-
Lymantria dispar japonica	Bogda-JA9-58	Japan	Honshu	Bogdanowicz et al. 2000	-	BOGDA058-08	-	-
Lymantria dispar japonica	CFIA-LEP0302	Japan	Honshu, Akita	This study	KX436382	MPGM302-15	-	-
Lymantria dispar japonica	CFIA-LEP0303	Japan	Honshu, Akita	This study	KX436383	MPGM303-15	-	-
Lymantria dispar japonica	CFS1	Japan	Honshu	This study	KX436567	-	KX436205	-
Lymantria dispar japonica	CFS2	Japan	Northern Iwate: Takizawa, Morika, Nishine Hachimantai City	This study	KX436568	-	KX436206	-
Lymantria dispar japonica	Ly232	Japan	Honshu	Armstrong and Ball 2005	DQ116111	-	-	-
Lymantria dispar japonica	Ly321	Japan	Honshu	Armstrong and Ball 2005	DQ116110	-	-	-
Lymantria dispar japonica	Ly326	Japan	Honshu	Armstrong and Ball 2005	DQ116131	-	-	-
Lymantria dispar japonica	Ly328	Japan	Honshu	Armstrong and Ball 2005	DQ116136	-	-	-
Lymantria dispar japonica	Ly332	Japan	Honshu	Armstrong and Ball 2005	DQ116125	-	-	-
Lymantria dispar japonica	Ly337	Japan	Honshu	Armstrong and Ball 2005	DQ116153	-	-	-
Lymantria dispar japonica	LymMk_Hon-1	Japan	Honshu	de Waard et al 2010	HM775625	-	-	-
Lymantria dispar japonica	LymMk_Hon-2	Japan	Honshu	de Waard et al 2010	HM775611	-	-	-
Lymantria dispar japonica	LymMk_Hon-3	Japan	Honshu	de Waard et al 2010	HM775604	-	-	-
Lymantria dispar japonica	ww1205	Japan	Honshu	de Waard et al 2010	HM775753	-	-	-
Lymantria dispar japonica	ww1206	Japan	Honshu	de Waard et al 2010	HM775752	-	-	-
Lymantria dispar japonica	ww1207	Japan	Honshu	de Waard et al 2010	HM775751	-	-	-
Lymantria dispar japonica	ww1208	Japan	Honshu	de Waard et al 2010	HM775750	-	-	-
Lymantria umbrosa	-	Japan	Hokkaido	Bogdanowicz et al. 2000	AF075273	-	-	-
Lymantria umbrosa	Bogda-JA10-59	Japan	Hokkaido	Bogdanowicz et al. 2000	-	BOGDA059-08	-	-
Lymantria umbrosa	Bogda-JA10-60	Japan	Hokkaido	Bogdanowicz et al. 2000	-	BOGDA060-08	-	-
Lymantria umbrosa	Bogda-JA10-61	Japan	Hokkaido	Bogdanowicz et al. 2000	-	BOGDA061-08	-	-
Lymantria umbrosa	Bogda-JA10-62	Japan	Hokkaido	Bogdanowicz et al. 2000	-	BOGDA062-08	-	-
Lymantria umbrosa	Bogda-JA10-63	Japan	Hokkaido	Bogdanowicz et al. 2000	-	BOGDA063-08	-	-
Lymantria umbrosa	CFIA-LEP0452	Japan	Asari, Otaru	This study	KX436442	MPGM452-15	-	-
Lymantria umbrosa	H10	Japan	Hokkaido	Yamaguchi et al. unpublished	AB244652	-	-	-
Lymantria umbrosa	H2	Japan	Hokkaido	Yamaguchi et al. unpublished	AB244661	-	-	-
Lymantria umbrosa	H3	Japan	Hokkaido	Yamaguchi et al. unpublished	AB244657	-	-	-
Lymantria umbrosa	H5	Japan	Hokkaido	Yamaguchi et al. unpublished	AB244664	-	-	-
Lymantria umbrosa	H7	Japan	Hokkaido	Yamaguchi et al. unpublished	AB244666	-	-	-
Lymantria umbrosa	H8	Japan	Hokkaido	Yamaguchi et al. unpublished	AB244667	-	-	-
Lymantria umbrosa	H9	Japan	Hokkaido	Yamaguchi et al. unpublished	AB244668	-	-	-
Lymantria umbrosa	Ly419	Japan	Hokkaido	Armstrong and Ball 2005	DQ116126	-	-	-
Lymantria umbrosa	Ly420	Japan	Hokkaido	Armstrong and Ball 2005	DQ116167	-	-	-
Lymantria umbrosa	Ly475	Japan	Hokkaido	Armstrong and Ball 2005	DQ116179	-	-	-
Lymantria umbrosa	Ly477	Japan	Hokkaido	Armstrong and Ball 2005	DQ116180	-	-	-
Lymantria umbrosa	Ly479	Japan	Hokkaido	Armstrong and Ball 2005	DQ116181	-	-	-
Lymantria umbrosa	Ly480	Japan	Hokkaido	Armstrong and Ball 2005	DQ116182	-	-	-
Lymantria umbrosa	LymMk_JJ-2	Japan	Hokkaido	de Waard et al 2010	HM775853	-	-	-
Lymantria umbrosa	LymMk_JJ-3	Japan	Hokkaido	de Waard et al 2010	HM775854	-	-	-
L. dispar (subspecies unspecified)†
Lymantria dispar	10-JDWBC-7981	Canada	British Columbia	de Waard et al 2010	HM775700	-	-	-
Lymantria dispar	A1	Japan	-	Yamaguchi et al. unpublished	AB244647	-	-	-
Lymantria dispar	Bogda-JA10-64	Japan	Hokkaido	Bogdanowicz et al. 2000	-	BOGDA064-08	-	-
Lymantria dispar	Bogda-JA5-45	Japan	Oshima Island	Bogdanowicz et al. 2000	-	BOGDA045-08	-	-
Lymantria dispar	Bogda-JA5-46	Japan	Ibaraki Pref.	Bogdanowicz et al. 2000	-	BOGDA046-08	-	-
Lymantria dispar	Bogda-JA5-47	Japan	Ibaraki Pref.	Bogdanowicz et al. 2000	-	BOGDA047-08	-	-
Lymantria dispar	Bogda-JA5-48	Japan	Ibaraki Pref.	Bogdanowicz et al. 2000	-	BOGDA048-08	-	-
Lymantria dispar	Bogda-JA5-49	Japan	Ibaraki Pref.	Bogdanowicz et al. 2000	-	BOGDA049-08	-	-
Lymantria dispar	Bogda-JA5-50	Japan	Ibaraki Pref.	Bogdanowicz et al. 2000	-	BOGDA050-08	-	-
Lymantria dispar	Bogda-JA5-51	Japan	Ibaraki Pref.	Bogdanowicz et al. 2000	-	BOGDA051-08	-	-
Lymantria dispar	CFIA-LEP0001	Russia	Primorsky Krai	This study	KX436239	MPGM001-15	KX436143	-
Lymantria dispar	CFIA-LEP0002	Russia	Primorsky Krai	This study	KX436310	MPGM192-15	KX436161	-
Lymantria dispar	CFIA-LEP0003	Russia	Primorsky Krai	This study	KX436311	MPGM193-15	KX436162	-
Lymantria dispar	CFIA-LEP0004	Canada	British Columbia	This study	KX436312	MPGM194-15	KX436163	-
Lymantria dispar	CFIA-LEP0005	Russia	Primorsky Krai	This study	KX436313	MPGM195-15	KX436164	-
Lymantria dispar	CFIA-LEP0006	Canada	British Columbia	This study	KX436314	MPGM196-15	KX436165	-
Lymantria dispar	CFIA-LEP0008	Canada	British Columbia	This study	KX436316	MPGM198-15	KX436166	-
Lymantria dispar	CFIA-LEP0009	Canada	Manitoba	This study	KX436317	MPGM199-15	-	-
Lymantria dispar	CFIA-LEP0010	Canada	Prince Edward Island	This study	KX436318	MPGM200-15	-	-
Lymantria dispar	CFIA-LEP0011	Canada	New Brunswick	This study	KX436319	MPGM201-15	KX436167	-
Lymantria dispar	CFIA-LEP0012	Canada	Quebec	This study	KX436320	MPGM202-15	KX436168	-
Lymantria dispar	CFIA-LEP0013	Canada	Prince Edward Island	This study	KX436321	MPGM203-15	KX436169	-
Lymantria dispar	CFIA-LEP0014	Canada	Nova Scotia	This study	KX436322	MPGM204-15	-	-
Lymantria dispar	CFIA-LEP0015	Canada	New Brunswick	This study	KX436323	MPGM205-15	-	-
Lymantria dispar	CFIA-LEP0017	Canada	Newfoundland and Labrador	This study	KX436324	MPGM207-15	KX436171	-
Lymantria dispar	CFIA-LEP0018	Canada	Newfoundland and Labrador	This study	KX436325	MPGM208-15	KX436172	-
Lymantria dispar	CFIA-LEP0019	Canada	Newfoundland and Labrador	This study	KX436326	MPGM209-15	KX436173	-
Lymantria dispar	CFIA-LEP0021	Canada	British Columbia	This study	KX436327	MPGM211-15	-	-
Lymantria dispar	CFIA-LEP0022	Canada	British Columbia	This study	KX436328	MPGM212-15	-	-
Lymantria dispar	CFIA-LEP0023	Canada	Alberta	This study	KX436329	MPGM213-15	KX436174	-
Lymantria dispar	CFIA-LEP0024	Canada	Manitoba	This study	KX436330	MPGM214-15	-	-
Lymantria dispar	CFIA-LEP0025	Canada	Manitoba	This study	KX436331	MPGM215-15	KX436175	-
Lymantria dispar	CFIA-LEP0026	Canada	Manitoba	This study	KX436332	MPGM216-15	KX436176	-
Lymantria dispar	CFIA-LEP0027	Canada	Manitoba	This study	KX436333	MPGM217-15	KX436177	-
Lymantria dispar	CFIA-LEP0028	Canada	Manitoba	This study	KX436334	MPGM218-15	KX436178	-
Lymantria dispar	CFIA-LEP0029	Canada	Newfoundland and Labrador	This study	KX436335	MPGM219-15	KX436179	-
Lymantria dispar	CFIA-LEP0030	Canada	British Columbia	This study	KX436336	MPGM220-15	KX436180	-
Lymantria dispar	CFIA-LEP0031	Canada	British Columbia	This study	KX436337	MPGM221-15	KX436181	-
Lymantria dispar	CFIA-LEP0032	Canada	British Columbia	This study	KX436338	MPGM222-15	KX436182	-
Lymantria dispar	CFIA-LEP0033	Canada	British Columbia	This study	KX436339	MPGM223-15	-	-
Lymantria dispar	CFIA-LEP0034	Canada	British Columbia	This study	KX436340	MPGM224-15	KX436183	-
Lymantria dispar	CFIA-LEP0035	Canada	British Columbia	This study	KX436341	MPGM225-15	KX436184	-
Lymantria dispar	CFIA-LEP0036	Canada	British Columbia	This study	KX436342	MPGM226-15	KX436185	-
Lymantria dispar	CFIA-LEP0037	Canada	Newfoundland and Labrador	This study	KX436343	MPGM227-15	KX436186	-
Lymantria dispar	CFIA-LEP0038	Canada	British Columbia	This study	KX436344	MPGM228-15	KX436187	-
Lymantria dispar	CFIA-LEP0039	Canada	Newfoundland and Labrador	This study	KX436345	MPGM229-15	KX436188	-
Lymantria dispar	CFIA-LEP0040	Canada	British Columbia	This study	KX436346	MPGM230-15	KX436189	-
Lymantria dispar	CFIA-LEP0041	Canada	British Columbia	This study	KX436347	MPGM231-15	-	-
Lymantria dispar	CFIA-LEP0042	Canada	British Columbia	This study	KX436348	MPGM232-15	KX436190	-
Lymantria dispar	CFIA-LEP0043	Canada	British Columbia	This study	KX436349	MPGM233-15	KX436191	-
Lymantria dispar	CFIA-LEP0044	Canada	British Columbia	This study	KX436350	MPGM234-15	KX436192	-
Lymantria dispar	CFIA-LEP0045	Canada	British Columbia	This study	KX436351	MPGM235-15	KX436193	-
Lymantria dispar	CFIA-LEP0046	Canada	British Columbia	This study	KX436352	MPGM236-15	KX436194	-
Lymantria dispar	CFIA-LEP0079	South Korea	Changjuk-dong, Geomnyong-so	This study	KX436353	MPGM269-15	-	-
Lymantria dispar	CFIA-LEP0080	South Korea	Mt. Hambaek, Hwangji-dong, Taebaek-si	This study	KX436354	MPGM270-15	KX436195	-
Lymantria dispar	CFIA-LEP0081	South Korea	Near Kangwon-Land, Sabuk-eup, Jengeon-gun	This study	KX436355	MPGM271-15	KX436196	-
Lymantria dispar	CFIA-LEP0082	South Korea	Hengsung-Gun, Kangwon-Do	This study	KX436356	MPGM272-15	-	-
Lymantria dispar	CFIA-LEP0083	South Korea	Hengsung-Gun, Kangwon-Do	This study	KX436357	MPGM273-15	KX436197	-
Lymantria dispar	CFIA-LEP0084	South Korea	HECRI, Guapcheon-Myun, Hangsung-Gun, Kangwon-Do	This study	KX436358	MPGM274-15	-	-
Lymantria dispar	CFIA-LEP0085	South Korea	HECRI, Guapcheon-Myun, Hangsung-Gun, Kangwon-Do	This study	KX436359	MPGM275-15	KX436198	-
Lymantria dispar	CFIA-LEP0086	South Korea	HECRI, Guapcheon-Myun, Hangsung-Gun, Kangwon-Do	This study	KX436360	MPGM276-15	KX436199	-
Lymantria dispar	CFIA-LEP0087	South Korea	Mt. Wolchulsan	This study	KX436361	MPGM277-15	-	-
Lymantria dispar	CFIA-LEP0088	South Korea	Mt. Sobaek	This study	KX436362	MPGM278-15	-	-
Lymantria dispar	CFIA-LEP0090	South Korea	Mt. Halla	This study	KX436363	MPGM280-15	-	-
Lymantria dispar	CFIA-LEP0145	Lebanon	Aakkar	This study	KX436247	MPGM051-15	-	-
Lymantria dispar	CFIA-LEP0146	Iran	Kuh-e-Sendan	This study	KX436248	MPGM052-15	-	-
Lymantria dispar	CFIA-LEP0147	Iraq	Kirkuk	This study	KX436249	MPGM053-15	-	-
Lymantria dispar	CFIA-LEP0148	Russia	N Caucasus	This study	KX436250	MPGM054-15	-	-
Lymantria dispar	CFIA-LEP0149	Kyrgyzstan	Teplokljuchenka	This study	KX436251	MPGM055-15	-	-
Lymantria dispar	CFIA-LEP0150	Tajikistan	Kondara	This study	KX436252	MPGM056-15	-	-
Lymantria dispar	CFIA-LEP0151	Tajikistan	Kondara	This study	KX436253	MPGM057-15	-	-
Lymantria dispar	CFIA-LEP0191	China	Inner Mongolia, Helanshan Moutain	This study	KX436255	MPGM097-15	-	-
Lymantria dispar	CFIA-LEP0192	China	Sinkiang:Aertai	This study	KX436256	MPGM098-15	KX436146	-
Lymantria dispar	CFIA-LEP0193	China	Sinkiang:Aertai	This study	KX436257	MPGM099-15	-	-
Lymantria dispar	CFIA-LEP0194	China	Sinkiang:Aertai	This study	KX436258	MPGM100-15	-	-
Lymantria dispar	CFIA-LEP0195	China	Xinjiang, Beitun	This study	KX436259	MPGM101-15	-	-
Lymantria dispar	CFIA-LEP0196	China	Inner Mongolia, Helanshan Moutain	This study	KX436260	MPGM102-15	-	-
Lymantria dispar	CFIA-LEP0198	China	Shaanxi:Taibai	This study	KX436261	MPGM104-15	-	-
Lymantria dispar	CFIA-LEP0216	Russia	Mineralni, Primorski	This study	KX436262	MPGM122-15	-	-
Lymantria dispar	CFIA-LEP0217	Russia	Vladivostok	This study	KX436263	MPGM123-15	KX436147	-
Lymantria dispar	CFIA-LEP0218	Russia	Mineralni, Primorski	This study	KX436264	MPGM124-15	KX436148	-
Lymantria dispar	CFIA-LEP0219	Russia	Mineralni, Primorski	This study	KX436265	MPGM125-15	KX436149	-
Lymantria dispar	CFIA-LEP0220	Russia	Vladivostok	This study	KX436266	MPGM126-15	KX436150	-
Lymantria dispar	CFIA-LEP0221	Russia	Vladivostok	This study	KX436267	MPGM127-15	KX436151	-
Lymantria dispar	CFIA-LEP0222	Russia	Vladivostok	This study	KX436268	MPGM128-15	KX436152	-
Lymantria dispar	CFIA-LEP0223	Japan	Honshu, Nagoya	This study	KX436269	MPGM129-15	KX436153	-
Lymantria dispar	CFIA-LEP0224	China	Beijing	This study	KX436270	MPGM130-15	KX436154	-
Lymantria dispar	CFIA-LEP0225	China	Beijing	This study	KX436271	MPGM131-15	-	-
Lymantria dispar	CFIA-LEP0226	China	Laixi	This study	KX436272	MPGM132-15	-	-
Lymantria dispar	CFIA-LEP0227	China	Niuzhuang	This study	KX436273	MPGM133-15	-	-
Lymantria dispar	CFIA-LEP0228	China	Niuzhuang	This study	KX436274	MPGM134-15	-	-
Lymantria dispar	CFIA-LEP0229	China	Beijing	This study	KX436275	MPGM135-15	-	-
Lymantria dispar	CFIA-LEP0230	China	Qianan	This study	KX436276	MPGM136-15	-	-
Lymantria dispar	CFIA-LEP0231	China	Qianan	This study	KX436277	MPGM137-15	KX436155	-
Lymantria dispar	CFIA-LEP0232	Croatia	Sumarija Novska	This study	KX436278	MPGM138-15	KX436156	-
Lymantria dispar	CFIA-LEP0233	Croatia	Sumarija Llrovljani	This study	KX436279	MPGM139-15	-	-
Lymantria dispar	CFIA-LEP0234	France	Preuilly-s-Claise, Touraine	This study	KX436280	MPGM140-15	KX436157	-
Lymantria dispar	CFIA-LEP0237	Japan	Shiroyama, Kagoshima city	This study	KX436283	MPGM143-15	-	-
Lymantria dispar	CFIA-LEP0240	Japan	Takao, Nakanoshima, Kagoshima pref	This study	KX436286	MPGM146-15	-	-
Lymantria dispar	CFIA-LEP0241	Japan	Mineyama, Mt. Iwaseo, Takamatsu, Kagawa	This study	KX436287	MPGM147-15	-	-
Lymantria dispar	CFIA-LEP0242	Japan	Mineyama, Mt. Iwaseo, Takamatsu, Kagawa	This study	KX436288	MPGM148-15	-	-
Lymantria dispar	CFIA-LEP0243	Japan	Mineyama, Mt. Iwaseo, Takamatsu, Kagawa	This study	KX436289	MPGM149-15	-	-
Lymantria dispar	CFIA-LEP0244	Japan	Mineyama, Mt. Iwaseo, Takamatsu, Kagawa	This study	KX436290	MPGM150-15	-	-
Lymantria dispar	CFIA-LEP0245	Japan	Ohgimachi (Garden), Takamatsu, Kagawa	This study	KX436291	MPGM151-15	-	-
Lymantria dispar	CFIA-LEP0257	Russia	Altaij, Lake Teletzkoje	This study	KX436297	MPGM163-15	-	-
Lymantria dispar	CFIA-LEP0258	Kazakhstan	Almaty	This study	KX436298	MPGM164-15	-	-
Lymantria dispar	CFIA-LEP0259	Kyrgyzstan	Issyk Ala	This study	KX436299	MPGM165-15	-	-
Lymantria dispar	CFIA-LEP0280	Mongolia	Omnegov, Tzokhor	This study	KX436304	MPGM186-15	-	-
Lymantria dispar	CFIA-LEP0281	Kyrgyzstan	Issyk Ala	This study	KX436305	MPGM187-15	-	-
Lymantria dispar	CFIA-LEP0282	Kazakhstan	Altij, Mt. Belucha	This study	KX436306	MPGM188-15	-	-
Lymantria dispar	CFIA-LEP0283	Mongolia	Selegne Aimak, Orkhon-gol, 15 km WNW of Orkhon	This study	KX436307	MPGM189-15	-	-
Lymantria dispar	CFIA-LEP0284	Croatia	Ravni village, Istria	This study	KX436308	MPGM190-15	-	-
Lymantria dispar	CFIA-LEP0285	Russia	Amur, Tyrma	This study	KX436309	MPGM191-15	-	-
Lymantria dispar	CFIA-LEP0286	Turkmenistan	Garygala, Kopetdag	This study	KX436368	MPGM286-15	-	-
Lymantria dispar	CFIA-LEP0288	Russia	Samara, Oktjabersk	This study	KX436369	MPGM288-15	-	-
Lymantria dispar	CFIA-LEP0289	Kazakhstan	Koksu	This study	KX436370	MPGM289-15	-	-
Lymantria dispar	CFIA-LEP0290	Kyrgyzstan	Mt. Chimgan	This study	KX436371	MPGM290-15	-	-
Lymantria dispar	CFIA-LEP0291	Russia	Tyrma	This study	KX436372	MPGM291-15	-	-
Lymantria dispar	CFIA-LEP0293	Kyrgyzstan	Frunze	This study	KX436373	MPGM293-15	-	-
Lymantria dispar	CFIA-LEP0294	Russia	Kuldur	This study	KX436374	MPGM294-15	-	-
Lymantria dispar	CFIA-LEP0295	Uzbekistan	W. Thien Shan Mt., Tshimgan Mt., Chimgan	This study	KX436375	MPGM295-15	-	-
Lymantria dispar	CFIA-LEP0296	China	Shaanxi, Daba shan	This study	KX436376	MPGM296-15	-	-
Lymantria dispar	CFIA-LEP0297	China	Daba Shan, 1-15 km S, Shou-Man village	This study	KX436377	MPGM297-15	-	-
Lymantria dispar	CFIA-LEP0298	China	Shaanxi, Taibai Shan	This study	KX436378	MPGM298-15	-	-
Lymantria dispar	CFIA-LEP0299	Russia	W Siberia, Kuznetskyi Alatau	This study	KX436379	MPGM299-15	-	-
Lymantria dispar	CFIA-LEP0300	Russia	W Siberia, Kuznetskyi Alatau	This study	KX436380	MPGM300-15	-	-
Lymantria dispar	CFIA-LEP0301	Russia	5 km W Donskoe, S Ural, Orenburg	This study	KX436381	MPGM301-15	-	-
Lymantria dispar	CFIA-LEP0391	Turkey	-	This study	KX436391	MPGM391-15	-	-
Lymantria dispar	CFIA-LEP0397	Russia	Samara area, Privolzhsky district, Privolzhye	This study	KX436394	MPGM397-15	KX436203	-
Lymantria dispar	CFIA-LEP0398	Russia	Samara area, Koshkinsky district, near Novaja Zhizhan village	This study	KX436395	MPGM398-15	-	-
Lymantria dispar	CFIA-LEP0399	Russia	Samara area, Sergievsk district, near Sergievsk	This study	KX436396	MPGM399-15	-	-
Lymantria dispar	CFIA-LEP0400	Russia	Samara area, Sergievsk district, near Sergievsk	This study	KX436397	MPGM400-15	KX436204	-
Lymantria dispar	CFIA-LEP0401	Russia	Samara area, Zhigulevsky Nature Reserve	This study	KX436398	MPGM401-15	-	-
Lymantria dispar	CFIA-LEP0402	Russia	Samara area, Koshkinsky district, near Novaja Zhizhan village	This study	KX436399	MPGM402-15	-	-
Lymantria dispar	CFIA-LEP0403	Russia	Samara area, Kinel district, near Alekseevka village	This study	KX436400	MPGM403-15	-	-
Lymantria dispar	CFIA-LEP0404	Russia	Samara area, Sergievsk district, near Suhodol village	This study	KX436401	MPGM404-15	-	-
Lymantria dispar	CFIA-LEP0408	Kazakhstan	South Kazakhstan region, Karatau Mts., near Tirekty village	This study	KX436402	MPGM408-15	-	-
Lymantria dispar	CFIA-LEP0409	Kazakhstan	South Kazakhstan region, Karatau Mts., near Tirekty village	This study	KX436403	MPGM409-15	-	-
Lymantria dispar	CFIA-LEP0410	Kazakhstan	South Kazakhstan region, Karatau Mts., near Bayzhansay village	This study	KX436404	MPGM410-15	-	-
Lymantria dispar	CFIA-LEP0411	Russia	Bashkortostan, Beloretsky district, Belaya river	This study	KX436405	MPGM411-15	-	-
Lymantria dispar	CFIA-LEP0412	Russia	Samara area, Tashla district, near Novy Bajan village	This study	KX436406	MPGM412-15	-	-
Lymantria dispar	CFIA-LEP0413	Russia	Samara area, Bogatoe district, near Bogatoe	This study	KX436407	MPGM413-15	-	-
Lymantria dispar	CFIA-LEP0416	Russia	Bashkortostan, Baimak district, Irendyk Mts	This study	KX436410	MPGM416-15	-	-
Lymantria dispar	CFIA-LEP0417	Kazakhstan	South Kazakhstan region, Karatau Mts., near Achysay village	This study	KX436411	MPGM417-15	-	-
Lymantria dispar	CFIA-LEP0422	Russia	Bashkortostan, Kugarchinsky district, Bolshoy Ik river, Juldybaevo village	This study	No sequence	MPGM422-15	-	-
Lymantria dispar	CFIA-LEP0423	Kazakhstan	South Kazakhstan region, Karatau Mts., near Tirekty village	This study	KX436416	MPGM423-15	-	-
Lymantria dispar	CFIA-LEP0426	Russia	Bashkortostan, Kugarchinsky district, Bolshoy Ik river, Juldybaevo village	This study	KX436419	MPGM426-15	-	-
Lymantria dispar	CFIA-LEP0427	Ukraine	Crimea peninsula	This study	KX436420	MPGM427-15	-	-
Lymantria dispar	CFIA-LEP0429	Russia	Bashkortostan, Kugarchinsky district, Bolshoy Ik river, Juldybaevo village	This study	KX436422	MPGM429-15	-	-
Lymantria dispar	CFIA-LEP0430	Russia	Bashkortostan, Burzyansky district, near Galikberovo village	This study	KX436423	MPGM430-15	-	-
Lymantria dispar	CFIA-LEP0431	Russia	Bashkortostan, Burzyansky district, near Galikberovo village	This study	KX436424	MPGM431-15	-	-
Lymantria dispar	CFIA-LEP0434	Canada	Walter Bean Grand River Trail	This study	KX436426	MPGM434-15	-	-
Lymantria dispar	CFIA-LEP0435	Kazakhstan	South Kazakhstan region, Karatau Mts., near Tirekty village	This study	KX436427	MPGM435-15	-	-
Lymantria dispar	CFIA-LEP0436	Canada	Vancouver port	This study	KX436428	MPGM436-15	-	-
Lymantria dispar	CFIA-LEP0438	Japan	Genda Miyagawa, Hida, Gifu pref.	This study	KX436429	MPGM438-15	-	-
Lymantria dispar	CFIA-LEP0439	Japan	Sengen-yama, Kani	This study	KX436430	MPGM439-15	-	-
Lymantria dispar	CFIA-LEP0440	Japan	Sengen-yama, Kani	This study	KX436431	MPGM440-15	-	-
Lymantria dispar	CFIA-LEP0441	Japan	Umegashima, Shizuoka	This study	KX436432	MPGM441-15	-	-
Lymantria dispar	CFIA-LEP0442	Japan	Saga, Kyushu	This study	KX436433	MPGM442-15	-	-
Lymantria dispar	CFIA-LEP0443	Russia	NE Gornotaezhnoye	This study	KX436434	MPGM443-15	-	-
Lymantria dispar	CFIA-LEP0444	Russia	NE Gornotaezhnoye	This study	KX436435	MPGM444-15	-	-
Lymantria dispar	CFIA-LEP0445	Russia	NE Gornotaezhnoye	This study	KX436436	MPGM445-15	-	-
Lymantria dispar	CFIA-LEP0446	Russia	NE Gornotaezhnoye	This study	KX436437	MPGM446-15	-	-
Lymantria dispar	CFIA-LEP0447	Russia	NE Gornotaezhnoye	This study	KX436438	MPGM447-15	-	-
Lymantria dispar	CFIA-LEP0448	Canada	Cactus Field	This study	KX436439	MPGM448-15	-	-
Lymantria dispar	CFIA-LEP0450	Japan	Asari, Otaru	This study	KX436440	MPGM450-15	-	-
Lymantria dispar	CFIA-LEP0451	Japan	Asari, Otaru	This study	KX436441	MPGM451-15	-	-
Lymantria dispar	CFIA-LEP0455	Kazakhstan	Koram	This study	KX436443	MPGM455-15	-	-
Lymantria dispar	CFIA-LEP0456	Kazakhstan	Koram	This study	KX436444	MPGM456-15	-	-
Lymantria dispar	CFIA-LEP0457	Kazakhstan	Koram	This study	KX436445	MPGM457-15	-	-
Lymantria dispar	CFIA-LEP0458	Kazakhstan	Koram	This study	KX436446	MPGM458-15	-	-
Lymantria dispar	CFIA-LEP0459	Kazakhstan	Koram	This study	KX436447	MPGM459-15	-	-
Lymantria dispar	CFIA-LEP0460	Kazakhstan	Usek	This study	KX436448	MPGM460-15	-	-
Lymantria dispar	CFIA-LEP0461	Kazakhstan	Koram	This study	KX436449	MPGM461-15	-	-
Lymantria dispar	CFIA-LEP0462	Kazakhstan	Koram	This study	KX436450	MPGM462-15	-	-
Lymantria dispar	CFIA-LEP0463	Kazakhstan	Koram	This study	KX436451	MPGM463-15	-	-
Lymantria dispar	CFIA-LEP0464	Kazakhstan	Koram	This study	KX436452	MPGM464-15	-	-
Lymantria dispar	CFIA-LEP0465	Russia	Nizhny Novgorod	This study	KX436453	MPGM465-15	-	-
Lymantria dispar	CFIA-LEP0466	Russia	Nizhny Novgorod	This study	KX436454	MPGM466-15	-	-
Lymantria dispar	CFIA-LEP0467	Russia	Nizhny Novgorod	This study	KX436455	MPGM467-15	-	-
Lymantria dispar	CFIA-LEP0468	Russia	Nizhny Novgorod	This study	KX436456	MPGM468-15	-	-
Lymantria dispar	CFIA-LEP0469	Kazakhstan	Chingilsu Valley	This study	KX436457	MPGM469-15	-	-
Lymantria dispar	CFIA-LEP0470	Kazakhstan	Usek	This study	KX436458	MPGM470-15	-	-
Lymantria dispar	CFIA-LEP0471	Kazakhstan	Usek	This study	KX436459	MPGM471-15	-	-
Lymantria dispar	CFIA-LEP0472	Kazakhstan	Chingilsu Valley	This study	KX436460	MPGM472-15	-	-
Lymantria dispar	CFIA-LEP0473	Kazakhstan	Ile river	This study	KX436461	MPGM473-15	-	-
Lymantria dispar	CFIA-LEP0474	Kazakhstan	Ile river	This study	KX436462	MPGM474-15	-	-
Lymantria dispar	CFIA-LEP0475	Kazakhstan	Ile river	This study	KX436463	MPGM475-15	-	-
Lymantria dispar	CFIA-LEP0476	Kyrgyzstan	Ala-Too	This study	KX436464	MPGM476-15	-	-
Lymantria dispar	CFIA-LEP0477	Kyrgyzstan	Ala-Too	This study	KX436465	MPGM477-15	-	-
Lymantria dispar	CFIA-LEP0478	Kyrgyzstan	Toktogul	This study	KX436466	MPGM478-15	-	-
Lymantria dispar	CFIA-LEP0479	Kyrgyzstan	Toktogul	This study	KX436467	MPGM479-15	-	-
Lymantria dispar	CFIA-LEP0480	Kyrgyzstan	Toktogul	This study	KX436468	MPGM480-15	-	-
Lymantria dispar	CFIA-LEP0481	Ukraine	Kerchensky district, Gornostaev ka	This study	KX436469	MPGM481-15	-	-
Lymantria dispar	CFIA-LEP0482	Russia	Sadov oya	This study	KX436470	MPGM482-15	-	-
Lymantria dispar	CFIA-LEP0483	Kazakhstan	-	This study	KX436471	MPGM483-15	-	-
Lymantria dispar	CFIA-LEP0492	Czech Republic	Lulec	This study	KX436475	MPGM492-15	-	-
Lymantria dispar	CFIA-LEP0493	Czech Republic	Liberec	This study	KX436476	MPGM493-15	-	-
Lymantria dispar	CFIA-LEP0511	Canada	-	This study	KX436481	MPGM511-16	-	-
Lymantria dispar	CFIA-LEP0515	Canada	-	This study	KX436482	MPGM515-16	-	-
Lymantria dispar	CFIA-LEP0516	Canada	-	This study	KX436483	MPGM516-16	-	-
Lymantria dispar	CFIA-LEP0517	Canada	-	This study	KX436484	MPGM517-16	-	-
Lymantria dispar	CFIA-LEP0518	Canada	-	This study	KX436485	MPGM518-16	-	-
Lymantria dispar	CFIA-LEP0520	Canada	-	This study	KX436486	MPGM520-16	-	-
Lymantria dispar	CFIA-LEP0527	Canada	-	This study	KX436487	MPGM527-16	-	-
Lymantria dispar	CFIA-LEP0553	Canada	Vancouver	This study	KX436490	MPGM553-16	-	-
Lymantria dispar	CFIA-LEP0563	Canada	Vancouver	This study	KX436492	MPGM563-16	-	-
Lymantria dispar	CFIA-LEP0568	Canada	YORK COUNTY, Little`s Lumber, Harvey	This study	KX436493	MPGM568-16	-	-
Lymantria dispar	CFIA-LEP0580	Canada	Vancouver	This study	KX436494	MPGM580-16	-	-
Lymantria dispar	CFIA-LEP0588	Canada	North Vancouver	This study	KX436499	MPGM588-16	-	-
Lymantria dispar	CFIA-LEP0593	Canada	North Vancouver	This study	KX436500	MPGM593-16	-	-
Lymantria dispar	CFIA-LEP0598	Canada	North Vancouver	This study	KX436501	MPGM598-16	-	-
Lymantria dispar	CFIA-LEP0600	Canada	North Vancouver	This study	KX436503	MPGM600-16	-	-
Lymantria dispar	CFIA-LEP0609	Canada	Vancouver	This study	KX436505	MPGM609-16	-	-
Lymantria dispar	CFIA-LEP0614	Canada	Vancouver	This study	KX436506	MPGM614-16	-	-
Lymantria dispar	CFIA-LEP0615	Canada	Vancouver	This study	KX436507	MPGM615-16	-	-
Lymantria dispar	CFIA-LEP0620	Canada	Vancouver	This study	KX436508	MPGM620-16	-	-
Lymantria dispar	CFIA-LEP0621	Canada	Vancouver	This study	KX436509	MPGM621-16	-	-
Lymantria dispar	CFIA-LEP0622	Canada	Vancouver	This study	KX436510	MPGM622-16	-	-
Lymantria dispar	CFIA-LEP0627	Canada	Vancouver	This study	KX436511	MPGM627-16	-	-
Lymantria dispar	CFIA-LEP0628	Canada	Vancouver	This study	KX436512	MPGM628-16	-	-
Lymantria dispar	CFIA-LEP0631	Canada	Vancouver	This study	KX436513	MPGM631-16	-	-
Lymantria dispar	GMCA01	China	Anhui	Chen et al. 2016	-	GMCF001-14	-	-
Lymantria dispar	GMCA03	China	Anhui	Chen et al. 2016	-	GMCF002-14	-	-
Lymantria dispar	GMCA05	China	Anhui	Chen et al. 2016	-	GMCF003-14	-	-
Lymantria dispar	GMCA06	China	Anhui	Chen et al. 2016	-	GMCF004-14	-	-
Lymantria dispar	GMCA08	China	Anhui	Chen et al. 2016	-	GMCF005-14	-	-
Lymantria dispar	GMCA10	China	Anhui	Chen et al. 2016	-	GMCF006-14	-	-
Lymantria dispar	GMCA16	China	Anhui	Chen et al. 2016	-	GMCF007-14	-	-
Lymantria dispar	GMCA20	China	Anhui	Chen et al. 2016	-	GMCF008-14	-	-
Lymantria dispar	GMCA30	China	Anhui	Chen et al. 2016	-	GMCF009-14	-	-
Lymantria dispar	GMCB04	China	Beijing Shi	Chen et al. 2016	-	GMCF010-14	-	-
Lymantria dispar	GMCB07	China	Beijing Shi	Chen et al. 2016	-	GMCF011-14	-	-
Lymantria dispar	GMCB08	China	Beijing Shi	Chen et al. 2016	-	GMCF012-14	-	-
Lymantria dispar	GMCB10	China	Beijing Shi	Chen et al. 2016	-	GMCF013-14	-	-
Lymantria dispar	GMCB13	China	Beijing Shi	Chen et al. 2016	-	GMCF014-14	-	-
Lymantria dispar	GMCB14	China	Beijing Shi	Chen et al. 2016	-	GMCF015-14	-	-
Lymantria dispar	GMCB16	China	Beijing Shi	Chen et al. 2016	-	GMCF016-14	-	-
Lymantria dispar	GMCB17	China	Beijing Shi	Chen et al. 2016	-	GMCF017-14	-	-
Lymantria dispar	GMCB18	China	Beijing Shi	Chen et al. 2016	-	GMCF018-14	-	-
Lymantria dispar	GMCG01	China	Guizhou	Chen et al. 2016	-	GMCF019-14	-	-
Lymantria dispar	GMCG02	China	Guizhou	Chen et al. 2016	-	GMCF020-14	-	-
Lymantria dispar	GMCG03	China	Guizhou	Chen et al. 2016	-	GMCF021-14	-	-
Lymantria dispar	GMCG04	China	Guizhou	Chen et al. 2016	-	GMCF022-14	-	-
Lymantria dispar	GMCG05	China	Guizhou	Chen et al. 2016	-	GMCF023-14	-	-
Lymantria dispar	GMCG06	China	Guizhou	Chen et al. 2016	-	GMCF024-14	-	-
Lymantria dispar	GMCG07	China	Guizhou	Chen et al. 2016	-	GMCF025-14	-	-
Lymantria dispar	GMCG08	China	Guizhou	Chen et al. 2016	-	GMCF026-14	-	-
Lymantria dispar	GMCG10	China	Guizhou	Chen et al. 2016	-	GMCF027-14	-	-
Lymantria dispar	GMCG13	China	Guizhou	Chen et al. 2016	-	GMCF028-14	-	-
Lymantria dispar	GMCH13	China	Hebei	Chen et al. 2016	-	GMCF029-14	-	-
Lymantria dispar	GMCH14	China	Hebei	Chen et al. 2016	-	GMCF030-14	-	-
Lymantria dispar	GMCH15	China	Hebei	Chen et al. 2016	-	GMCF031-14	-	-
Lymantria dispar	GMCH16	China	Hebei	Chen et al. 2016	-	GMCF032-14	-	-
Lymantria dispar	GMCH17	China	Hebei	Chen et al. 2016	-	GMCF033-14	-	-
Lymantria dispar	GMCH18	China	Hebei	Chen et al. 2016	-	GMCF034-14	-	-
Lymantria dispar	GMCH19	China	Hebei	Chen et al. 2016	-	GMCF035-14	-	-
Lymantria dispar	GMCH20	China	Hebei	Chen et al. 2016	-	GMCF036-14	-	-
Lymantria dispar	GMCH21	China	Hebei	Chen et al. 2016	-	GMCF037-14	-	-
Lymantria dispar	GMCH23	China	Hebei	Chen et al. 2016	-	GMCF038-14	-	-
Lymantria dispar	GMCJ01	China	Jining	Chen et al. 2016	-	GMCF039-14	-	-
Lymantria dispar	GMCJ03	China	Jining	Chen et al. 2016	-	GMCF040-14	-	-
Lymantria dispar	GMCJ05	China	Jining	Chen et al. 2016	-	GMCF041-14	-	-
Lymantria dispar	GMCJ07	China	Jining	Chen et al. 2016	-	GMCF042-14	-	-
Lymantria dispar	GMCJ08	China	Jining	Chen et al. 2016	-	GMCF043-14	-	-
Lymantria dispar	GMCJ09	China	Jining	Chen et al. 2016	-	GMCF044-14	-	-
Lymantria dispar	GMCL01	China	Liaoning	Chen et al. 2016	-	GMCF045-14	-	-
Lymantria dispar	GMCL02	China	Liaoning	Chen et al. 2016	-	GMCF046-14	-	-
Lymantria dispar	GMCL04	China	Liaoning	Chen et al. 2016	-	GMCF047-14	-	-
Lymantria dispar	GMCL09	China	Liaoning	Chen et al. 2016	-	GMCF048-14	-	-
Lymantria dispar	GMCL10	China	Liaoning	Chen et al. 2016	-	GMCF049-14	-	-
Lymantria dispar	GMCL12	China	Liaoning	Chen et al. 2016	-	GMCF050-14	-	-
Lymantria dispar	GMCR02	China	Heilongjiang Sheng	Chen et al. 2016	-	GMCF051-14	-	-
Lymantria dispar	GMCR04	China	Heilongjiang Sheng	Chen et al. 2016	-	GMCF052-14	-	-
Lymantria dispar	GMCR05	China	Heilongjiang Sheng	Chen et al. 2016	-	GMCF053-14	-	-
Lymantria dispar	GMCR07	China	Heilongjiang Sheng	Chen et al. 2016	-	GMCF054-14	-	-
Lymantria dispar	GMCR11	China	Heilongjiang Sheng	Chen et al. 2016	-	GMCF055-14	-	-
Lymantria dispar	GMCR12	China	Heilongjiang Sheng	Chen et al. 2016	-	GMCF056-14	-	-
Lymantria dispar	GMCR13	China	Heilongjiang Sheng	Chen et al. 2016	-	GMCF057-14	-	-
Lymantria dispar	GMCS01	China	Jiangsu	Chen et al. 2016	-	GMCF058-14	-	-
Lymantria dispar	GMCS02	China	Jiangsu	Chen et al. 2016	-	GMCF059-14	-	-
Lymantria dispar	GMCS03	China	Jiangsu	Chen et al. 2016	-	GMCF060-14	-	-
Lymantria dispar	GMCS05	China	Jiangsu	Chen et al. 2016	-	GMCF061-14	-	-
Lymantria dispar	GMCS06	China	Jiangsu	Chen et al. 2016	-	GMCF062-14	-	-
Lymantria dispar	GMCS07	China	Jiangsu	Chen et al. 2016	-	GMCF063-14	-	-
Lymantria dispar	GMCS08	China	Jiangsu	Chen et al. 2016	-	GMCF064-14	-	-
Lymantria dispar	GMCS09	China	Jiangsu	Chen et al. 2016	-	GMCF065-14	-	-
Lymantria dispar	GMCS10	China	Jiangsu	Chen et al. 2016	-	GMCF066-14	-	-
Lymantria dispar	GMCS18	China	Jiangsu	Chen et al. 2016	-	GMCF067-14	-	-
Lymantria dispar	GMCX01	China	Arxan	Chen et al. 2016	-	GMCF068-14	-	-
Lymantria dispar	GMCX03	China	Arxan	Chen et al. 2016	-	GMCF069-14	-	-
Lymantria dispar	GMCX04	China	Arxan	Chen et al. 2016	-	GMCF070-14	-	-
Lymantria dispar	GMCX05	China	Arxan	Chen et al. 2016	-	GMCF071-14	-	-
Lymantria dispar	GMCX06	China	Arxan	Chen et al. 2016	-	GMCF072-14	-	-
Lymantria dispar	GMCX08	China	Arxan	Chen et al. 2016	-	GMCF073-14	-	-
Lymantria dispar	GMCX10	China	Arxan	Chen et al. 2016	-	GMCF074-14	-	-
Lymantria dispar	GMGK01	Greece	Kavala	Chen et al. 2016	-	GMCF092-14	-	-
Lymantria dispar	GMGK02	Greece	Kavala	Chen et al. 2016	-	GMCF093-14	-	-
Lymantria dispar	GMGK03	Greece	Kavala	Chen et al. 2016	-	GMCF094-14	-	-
Lymantria dispar	GMGK04	Greece	Kavala	Chen et al. 2016	-	GMCF095-14	-	-
Lymantria dispar	GMGK05	Greece	Kavala	Chen et al. 2016	-	GMCF096-14	-	-
Lymantria dispar	GMGK06	Greece	Kavala	Chen et al. 2016	-	GMCF097-14	-	-
Lymantria dispar	GMGK11	Greece	Kavala	Chen et al. 2016	-	GMCF098-14	-	-
Lymantria dispar	GMGK12	Greece	Kavala	Chen et al. 2016	-	GMCF099-14	-	-
Lymantria dispar	GMGK13	Greece	Kavala	Chen et al. 2016	-	GMCF100-14	-	-
Lymantria dispar	GMJN02	Japan	Honshu	Chen et al. 2016	-	GMCF085-14	-	-
Lymantria dispar	GMJN04	Japan	Honshu	Chen et al. 2016	-	GMCF086-14	-	-
Lymantria dispar	GMJN05	Japan	Honshu	Chen et al. 2016	-	GMCF087-14	-	-
Lymantria dispar	GMJN06	Japan	Honshu	Chen et al. 2016	-	GMCF088-14	-	-
Lymantria dispar	GMJN08	Japan	Honshu	Chen et al. 2016	-	GMCF089-14	-	-
Lymantria dispar	GMJN09	Japan	Honshu	Chen et al. 2016	-	GMCF090-14	-	-
Lymantria dispar	GMJN11	Japan	Honshu	Chen et al. 2016	-	GMCF091-14	-	-
Lymantria dispar	GMJT02	Japan	Kanto	Chen et al. 2016	-	GMCF075-14	-	-
Lymantria dispar	GMJT03	Japan	Kanto	Chen et al. 2016	-	GMCF076-14	-	-
Lymantria dispar	GMJT04	Japan	Kanto	Chen et al. 2016	-	GMCF077-14	-	-
Lymantria dispar	GMJT05	Japan	Kanto	Chen et al. 2016	-	GMCF078-14	-	-
Lymantria dispar	GMJT06	Japan	Kanto	Chen et al. 2016	-	GMCF079-14	-	-
Lymantria dispar	GMJT07	Japan	Kanto	Chen et al. 2016	-	GMCF080-14	-	-
Lymantria dispar	GMJT08	Japan	Kanto	Chen et al. 2016	-	GMCF081-14	-	-
Lymantria dispar	GMJT09	Japan	Kanto	Chen et al. 2016	-	GMCF082-14	-	-
Lymantria dispar	GMJT10	Japan	Kanto	Chen et al. 2016	-	GMCF083-14	-	-
Lymantria dispar	GMJT11	Japan	Kanto	Chen et al. 2016	-	GMCF084-14	-	-
Lymantria dispar	GMLJ04	Lithuania	Juodkrante	Chen et al. 2016	-	GMCF101-14	-	-
Lymantria dispar	GMLJ05	Lithuania	Juodkrante	Chen et al. 2016	-	GMCF102-14	-	-
Lymantria dispar	GMLJ06	Lithuania	Juodkrante	Chen et al. 2016	-	GMCF103-14	-	-
Lymantria dispar	GMLJ11	Lithuania	Juodkrante	Chen et al. 2016	-	GMCF104-14	-	-
Lymantria dispar	GMLJ12	Lithuania	Juodkrante	Chen et al. 2016	-	GMCF105-14	-	-
Lymantria dispar	GMRBI01	Russia	Krasnoyarsk Krai	Chen et al. 2016	-	GMCF116-14	-	-
Lymantria dispar	GMRBI03	Russia	Krasnoyarsk Krai	Chen et al. 2016	-	GMCF117-14	-	-
Lymantria dispar	GMRBI04	Russia	Krasnoyarsk Krai	Chen et al. 2016	-	GMCF118-14	-	-
Lymantria dispar	GMRBI05	Russia	Krasnoyarsk Krai	Chen et al. 2016	-	GMCF119-14	-	-
Lymantria dispar	GMRBI07	Russia	Krasnoyarsk Krai	Chen et al. 2016	-	GMCF120-14	-	-
Lymantria dispar	GMRBI08	Russia	Krasnoyarsk Krai	Chen et al. 2016	-	GMCF121-14	-	-
Lymantria dispar	GMRBI09	Russia	Krasnoyarsk Krai	Chen et al. 2016	-	GMCF122-14	-	-
Lymantria dispar	GMRBI10	Russia	Krasnoyarsk Krai	Chen et al. 2016	-	GMCF123-14	-	-
Lymantria dispar	GMRBI14	Russia	Krasnoyarsk Krai	Chen et al. 2016	-	GMCF124-14	-	-
Lymantria dispar	GMRBI15	Russia	Krasnoyarsk Krai	Chen et al. 2016	-	GMCF125-14	-	-
Lymantria dispar	GMRM01	Russia	Primorsky Krai	Chen et al. 2016	-	GMCF126-14	-	-
Lymantria dispar	GMRM02	Russia	Primorsky Krai	Chen et al. 2016	-	GMCF127-14	-	-
Lymantria dispar	GMRM03	Russia	Primorsky Krai	Chen et al. 2016	-	GMCF128-14	-	-
Lymantria dispar	GMRM04	Russia	Primorsky Krai	Chen et al. 2016	-	GMCF129-14	-	-
Lymantria dispar	GMRM09	Russia	Primorsky Krai	Chen et al. 2016	-	GMCF130-14	-	-
Lymantria dispar	GMRM10	Russia	Primorsky Krai	Chen et al. 2016	-	GMCF131-14	-	-
Lymantria dispar	GMRM11	Russia	Primorsky Krai	Chen et al. 2016	-	GMCF132-14	-	-
Lymantria dispar	GMRM13	Russia	Primorsky Krai	Chen et al. 2016	-	GMCF133-14	-	-
Lymantria dispar	GMRM14	Russia	Primorsky Krai	Chen et al. 2016	-	GMCF134-14	-	-
Lymantria dispar	GMUC01	United States	Conneticut	Chen et al. 2016	-	GMCF106-14	-	-
Lymantria dispar	GMUC03	United States	Conneticut	Chen et al. 2016	-	GMCF107-14	-	-
Lymantria dispar	GMUC04	United States	Conneticut	Chen et al. 2016	-	GMCF108-14	-	-
Lymantria dispar	GMUC05	United States	Conneticut	Chen et al. 2016	-	GMCF109-14	-	-
Lymantria dispar	GMUC06	United States	Conneticut	Chen et al. 2016	-	GMCF110-14	-	-
Lymantria dispar	GMUC07	United States	Conneticut	Chen et al. 2016	-	GMCF111-14	-	-
Lymantria dispar	GMUC08	United States	Conneticut	Chen et al. 2016	-	GMCF112-14	-	-
Lymantria dispar	GMUC10	United States	Conneticut	Chen et al. 2016	-	GMCF113-14	-	-
Lymantria dispar	GMUC13	United States	Conneticut	Chen et al. 2016	-	GMCF114-14	-	-
Lymantria dispar	GMUC16	United States	Conneticut	Chen et al. 2016	-	GMCF115-14	-	-
Lymantria dispar	HLJ	China	Heilongjiang	Qian et al. 2014	HM013741	HM013741	-	-
Lymantria dispar	JAP1	Japan	-	Qian et al. 2014	HM013736	HM013736	-	-
Lymantria dispar	JAP2	Japan	-	Qian et al. 2014	HM013737	HM013737	-	-
Lymantria dispar	JAP3	Japan	-	Qian et al. 2014	HM013738	HM013738	-	-
Lymantria dispar	LD001-pD2A696L	-	-	Garner and Slavicek 1996	-	-	-	U37125
Lymantria dispar	LD006-pD2N591H	-	-	Garner and Slavicek 1996	-	-	-	U37128
Lymantria dispar	LD078-pD2A696-78B,C	-	-	Garner and Slavicek 1996	-	-	-	U37126
Lymantria dispar	LD078-pD2N591-78B,C	-	-	Garner and Slavicek 1996	-	-	-	U37129
Lymantria dispar	LD07-pD2A696-97B	-	-	Garner and Slavicek 1996	-	-	-	U37127
Lymantria dispar	LD097-pD2N591-97B	-	-	Garner and Slavicek 1996	-	-	-	U37130
Lymantria dispar	Ly33	Japan	-	Armstrong and Ball 2005	DQ116119	-	-	-
Lymantria dispar	Ly34	Japan	-	Armstrong and Ball 2005	DQ116120	-	-	-
Lymantria dispar	Ly35	Japan	-	Armstrong and Ball 2005	DQ116112	-	-	-
Lymantria dispar	Ly41	Japan	-	Armstrong and Ball 2005	DQ116121	-	-	-
Lymantria dispar	LymMk_RB-1	Russia	Krasnojarsk	de Waard et al 2010	HM775591	-	-	-
Lymantria dispar	LymMk_RB-2	Russia	Krasnojarsk	de Waard et al 2010	HM775590	-	-	-
Lymantria dispar	LymMk_RB-3	Russia	Krasnojarsk	de Waard et al 2010	HM775589	-	-	-
Lymantria dispar	LymMk_RBI-1	Russia	Khakassia	de Waard et al 2010	HM775588	-	-	-
Lymantria dispar	LymMk_RBI-2	Russia	Khakassia	de Waard et al 2010	HM775586	-	-	-
Lymantria dispar	LymMk_RBI-3	Russia	Khakassia	de Waard et al 2010	HM775585	-	-	-
Lymantria dispar	MA1	United States	Massachusetts	Qian et al. 2014	HM013739	HM013739	-	-
Lymantria dispar	MA2	United States	Massachusetts	Qian et al. 2014	HM013742	HM013742	-	-
Lymantria dispar	MG1	Mongolia	-	Qian et al. 2014	HM013732	HM013732	-	-
Lymantria dispar	MG2	Mongolia	-	Qian et al. 2014	HM013733	HM013733	-	-
Lymantria dispar	MG3	Mongolia	-	Qian et al. 2014	HM013734	HM013734	-	-
Lymantria dispar	MG4	Mongolia	-	Qian et al. 2014	HM013735	HM013735	-	-
Lymantria dispar	MG5	Mongolia	-	Qian et al. 2014	HM013743	HM013743	-	-
Lymantria dispar	NJ1	United States	New Jersey	Qian et al. 2014	HM013740	HM013740	-	-
Lymantria dispar	NJ2	United States	New Jersey	Qian et al. 2014	HM013744	HM013744	-	-
Lymantria dispar	RFV1	Russia	Vladivostok	Qian et al. 2014	HM013727	HM013727	-	-
Lymantria dispar	RFV2	Russia	Vladivostok	Qian et al. 2014	HM013728	HM013728	-	-
Lymantria dispar	RN1	Russia	Nahodka	Qian et al. 2014	HM013729	HM013729	-	-
Lymantria dispar	RN2	Russia	Nahodka	Qian et al. 2014	HM013730	HM013730	-	-
Lymantria dispar	RS	Russia	Slavyanka	Qian et al. 2014	HM013731	HM013731	-	-
Lymantria dispar	RV	Russia	Vladivostok	Qian et al. 2014	HM013726	HM013726	-	-
Lymantria dispar	RVO1	Russia	Vostochnyy	Qian et al. 2014	HM013724	HM013724	-	-
Lymantria dispar	RVO2	Russia	Vostochnyy	Qian et al. 2014	HM013725	HM013725	-	-
Lymantria dispar	WV	United States	West Virginia	Qian et al. 2014	HM013745	HM013745	-	-
Lymantria dispar	ww01243	Kyrgyzstan	Karalma	de Waard et al 2010	HM775704	-	-	-
Lymantria dispar	ww01244	Kyrgyzstan	Karalma	de Waard et al 2010	HM775703	-	-	-
Lymantria dispar	ww01245	Kyrgyzstan	Toktogul	de Waard et al 2010	HM775702	-	-	-
Lymantria dispar	ww01246	Kyrgyzstan	Toktogul	de Waard et al 2010	HM775701	-	-	-
EGM (L. dispar dispar)
Lymantria dispar dispar	-	United States	-	Bogdanowicz et al. 2000	AF075272	-	-	-
Lymantria dispar dispar	AGM12	Spain	-	This study	KX436552	-	-	-
Lymantria dispar dispar	AGM176	Canada	British Columbia	This study	KX436603	-	-	-
Lymantria dispar dispar	AGM20	Spain	-	This study	KX436553	-	-	-
Lymantria dispar dispar	AGM23	United States	Newark, Delaware	This study	-	-	KX436228	-
Lymantria dispar dispar	BIOUG<CAN>:2005-ONT-1242	Canada	Ontario	Hebert et al. 2010	GU091224	-	-	-
Lymantria dispar dispar	BIOUG<CAN>:2005-ONT-1262	Canada	Ontario	de Waard et al 2010	HM775738	-	-	-
Lymantria dispar dispar	BIOUG<CAN>:2005-ONT-1263	Canada	Ontario	de Waard et al 2010	HM775737	-	-	-
Lymantria dispar dispar	BIOUG<CAN>:2005-ONT-589	Canada	Ontario	Hebert et al. 2010	GU091217	-	-	-
Lymantria dispar dispar	BIOUG<CAN>:2005-ONT-761	Canada	Ontario	Hebert et al. 2010	GU091216	-	-	-
Lymantria dispar dispar	BIOUG<CAN>:2005-ONT-798	Canada	Ontario	Hebert et al. 2010	GU091222	-	-	-
Lymantria dispar dispar	BIOUG<CAN>:2005-ONT-799	Canada	Ontario	Hebert et al. 2010	GU091219	-	-	-
Lymantria dispar dispar	BIOUG<CAN>:2005-ONT-800	Canada	Ontario	Hebert et al. 2010	GU091220	-	-	-
Lymantria dispar dispar	BIOUG<CAN>:2005-ONT-801	Canada	Ontario	Hebert et al. 2010	GU091221	-	-	-
Lymantria dispar dispar	BIOUG<CAN>:2005-ONT-819	Canada	Ontario	Hebert et al. 2010	GU091223	-	-	-
Lymantria dispar dispar	BIOUG<CAN>:2005-ONT-861	Canada	Ontario	Hebert et al. 2010	GU091215	-	-	-
Lymantria dispar dispar	BIOUG<CAN>:2005-ONT-891	Canada	Ontario	Hebert et al. 2010	GU091213	-	-	-
Lymantria dispar dispar	BIOUG<CAN>:2005-ONT-892	Canada	Ontario	Hebert et al. 2010	GU091214	-	-	-
Lymantria dispar dispar	BIOUG<CAN>:2005-ONT-932	Canada	Ontario	Hebert et al. 2010	GU091218	-	-	-
Lymantria dispar dispar	BIOUG<CAN>:MNBTT-259	Canada	New Brunswick	de Waard et al 2010	HM775740	-	-	-
Lymantria dispar dispar	BIOUG<CAN>:MNBTT-260	Canada	New Brunswick	de Waard et al 2010	HM775739	-	-	-
Lymantria dispar dispar	BIOUG<CAN>:MNBTT-3246	Canada	New Brunswick	de Waard et al 2010	HM775744	-	-	-
Lymantria dispar dispar	BIOUG<CAN>:MNBTT-3247	Canada	New Brunswick	de Waard et al 2010	HM775743	-	-	-
Lymantria dispar dispar	BIOUG<CAN>:MNBTT-3248	Canada	New Brunswick	de Waard et al 2010	HM775742	-	-	-
Lymantria dispar dispar	BIOUG<CAN>:MNBTT-3249	Canada	New Brunswick	de Waard et al 2010	HM775741	-	-	-
Lymantria dispar dispar	Bogda-CAN-03	Canada	Ontario	Bogdanowicz et al. 2000	-	BOGDA003-08	-	-
Lymantria dispar dispar	Bogda-CAN-04	Canada	Ontario	Bogdanowicz et al. 2000	-	BOGDA004-08	-	-
Lymantria dispar dispar	Bogda-FRA-05	France	Provence-Alpes-Cote d`Azur	Bogdanowicz et al. 2000	-	BOGDA005-08	-	-
Lymantria dispar dispar	Bogda-FRA-06	France	Provence-Alpes-Cote d`Azur	Bogdanowicz et al. 2000	-	BOGDA006-08	-	-
Lymantria dispar dispar	Bogda-GER-07	Germany	Baden-Wuerttemberg	Bogdanowicz et al. 2000	-	BOGDA007-08	-	-
Lymantria dispar dispar	Bogda-GER-08	Germany	Baden-Wuerttemberg	Bogdanowicz et al. 2000	-	BOGDA008-08	-	-
Lymantria dispar dispar	Bogda-RA1-12	Russia	Moscow City	Bogdanowicz et al. 2000	-	BOGDA012-08	-	-
Lymantria dispar dispar	Bogda-RA1-13	Russia	Moscow City	Bogdanowicz et al. 2000	-	BOGDA013-08	-	-
Lymantria dispar dispar	Bogda-SAR-09	Italy	Sardinia	Bogdanowicz et al. 2000	-	BOGDA009-08	-	-
Lymantria dispar dispar	Bogda-SLO-10	Slovakia	Kurinec	Bogdanowicz et al. 2000	-	BOGDA010-08	-	-
Lymantria dispar dispar	Bogda-SLO-11	Slovakia	Kurinec	Bogdanowicz et al. 2000	-	BOGDA011-08	-	-
Lymantria dispar dispar	Bogda-TUN-14	Tunisia	Jendouba	Bogdanowicz et al. 2000	-	BOGDA014-08	-	-
Lymantria dispar dispar	Bogda-TUN-15	Tunisia	Jendouba	Bogdanowicz et al. 2000	-	BOGDA015-08	-	-
Lymantria dispar dispar	Bogda-US1-01	United States	New Jersey	Bogdanowicz et al. 2000	-	BOGDA001-08	-	-
Lymantria dispar dispar	Bogda-US2-02	United States	Vermont	Bogdanowicz et al. 2000	-	BOGDA002-08	-	-
Lymantria dispar dispar	CFS10	Lithuania	-	This study	KX436554	-	KX436214	-
Lymantria dispar dispar	CFS11	Greece	-	This study	KX436555	-	KX436215	-
Lymantria dispar dispar	CFS12	United States	Connecticut	This study	KX436556	-	KX436216	-
Lymantria dispar dispar	CFS8	Russia	Siberia	This study	KX436550	-	KX436212	-
Lymantria dispar dispar	FS1-SX120330-001	United States	New Jersey	Islam et al. 2015	-	-	-	KM401977
Lymantria dispar dispar	FS1-SX120330-002	United States	New Jersey	Islam et al. 2015	-	-	-	KM401978
Lymantria dispar dispar	FS1-SX120330-003	United States	New Jersey	Islam et al. 2015	-	-	-	KM401979
Lymantria dispar dispar	FS1-SX120330-004	United States	New Jersey	Islam et al. 2015	-	-	-	KM401980
Lymantria dispar dispar	FS1-SX120330-006	United States	New Jersey	Islam et al. 2015	-	-	-	KM401981
Lymantria dispar dispar	FS1-SX120330-007	United States	New Jersey	Islam et al. 2015	-	-	-	KM401982
Lymantria dispar dispar	FS1-SX120330-008	United States	New Jersey	Islam et al. 2015	-	-	-	KM401983
Lymantria dispar dispar	FS1-SX120330-009	United States	New Jersey	Islam et al. 2015	-	-	-	KM401984
Lymantria dispar dispar	FS1-SX120330-010	United States	New Jersey	Islam et al. 2015	-	-	-	KM401985
Lymantria dispar dispar	KAM DAB-9 A	Canada	British Columbia	de Waard et al 2010	HM775709	-	-	-
Lymantria dispar dispar	Lepi454	United States	-	Armstrong and Ball 2005	DQ116185	-	-	-
Lymantria dispar dispar	Ly161	United States	West Virginia	Armstrong and Ball 2005	DQ116162	-	-	-
Lymantria dispar dispar	Ly20	Canada	Ontario	Armstrong and Ball 2005	DQ116103	-	-	-
Lymantria dispar dispar	Ly21	Canada	Ontario	Armstrong and Ball 2005	DQ116118	-	-	-
Lymantria dispar dispar	Ly23	Canada	Ontario	Armstrong and Ball 2005	DQ116098	-	-	-
Lymantria dispar dispar	LymMk_A-1	Germany	Baden-Wuerttemberg	de Waard et al 2010	HM775655	-	-	-
Lymantria dispar dispar	LymMk_A-2	Germany	Baden-Wuerttemberg	de Waard et al 2010	HM775654	-	-	-
Lymantria dispar dispar	LymMk_A-3	Germany	Baden-Wuerttemberg	de Waard et al 2010	HM775653	-	-	-
Lymantria dispar dispar	LymMk_B-1	Germany	Baden-Wuerttemberg	de Waard et al 2010	HM775652	-	-	-
Lymantria dispar dispar	LymMk_B-2	Germany	Baden-Wuerttemberg	de Waard et al 2010	HM775651	-	-	-
Lymantria dispar dispar	LymMk_B-3	Germany	Baden-Wuerttemberg	de Waard et al 2010	HM775650	-	-	-
Lymantria dispar dispar	LymMk_BF-1	France	Poitou-Charentes	de Waard et al 2010	HM775668	-	-	-
Lymantria dispar dispar	LymMk_BF-2	France	Poitou-Charentes	de Waard et al 2010	HM775667	-	-	-
Lymantria dispar dispar	LymMk_BF-3	France	Poitou-Charentes	de Waard et al 2010	HM775666	-	-	-
Lymantria dispar dispar	LymMk_C-1	Germany	Baden-Wuerttemberg	de Waard et al 2010	HM775649	-	-	-
Lymantria dispar dispar	LymMk_C-2	Germany	Baden-Wuerttemberg	de Waard et al 2010	HM775648	-	-	-
Lymantria dispar dispar	LymMk_C-3	Germany	Baden-Wuerttemberg	de Waard et al 2010	HM775647	-	-	-
Lymantria dispar dispar	LymMk_CCL-1	Croatia	Primorsko-Goranska Zupanjia	de Waard et al 2010	HM775683	-	-	-
Lymantria dispar dispar	LymMk_CCL-2	Croatia	Primorsko-Goranska Zupanjia	de Waard et al 2010	HM775682	-	-	-
Lymantria dispar dispar	LymMk_CCL-3	Croatia	Primorsko-Goranska Zupanjia	de Waard et al 2010	HM775681	-	-	-
Lymantria dispar dispar	LymMk_CSL-1	Slovenia	Sumarija Llrovljani	de Waard et al 2010	HM775680	-	-	-
Lymantria dispar dispar	LymMk_CSL-2	Slovenia	Sumarija Llrovljani	de Waard et al 2010	HM775679	-	-	-
Lymantria dispar dispar	LymMk_CSL-3	Slovenia	Sumarija Llrovljani	de Waard et al 2010	HM775678	-	-	-
Lymantria dispar dispar	LymMk_CSN-1	Slovenia	Sumarija Novska	de Waard et al 2010	HM775677	-	-	-
Lymantria dispar dispar	LymMk_CSN-2	Slovenia	Sumarija Novska	de Waard et al 2010	HM775676	-	-	-
Lymantria dispar dispar	LymMk_CSN-3	Slovenia	Sumarija Novska	de Waard et al 2010	HM775675	-	-	-
Lymantria dispar dispar	LymMk_CSO-1	Slovenia	Sumarija otok	de Waard et al 2010	HM775674	-	-	-
Lymantria dispar dispar	LymMk_CSO-2	Slovenia	Sumarija otok	de Waard et al 2010	HM775673	-	-	-
Lymantria dispar dispar	LymMk_CSO-3	Slovenia	Sumarija otok	de Waard et al 2010	HM775672	-	-	-
Lymantria dispar dispar	LymMk_CSS-1	Slovenia	Sumarija strizovojha	de Waard et al 2010	HM775671	-	-	-
Lymantria dispar dispar	LymMk_CSS-2	Slovenia	Sumarija strizovojha	de Waard et al 2010	HM775670	-	-	-
Lymantria dispar dispar	LymMk_CSS-3	Slovenia	Sumarija strizovojha	de Waard et al 2010	HM775669	-	-	-
Lymantria dispar dispar	LymMk_CT-1	United States	Connecticut	de Waard et al 2010	HM775564	-	-	-
Lymantria dispar dispar	LymMk_CT-2	United States	Connecticut	de Waard et al 2010	HM775563	-	-	-
Lymantria dispar dispar	LymMk_CT2-1	United States	Connecticut	de Waard et al 2010	HM775561	-	-	-
Lymantria dispar dispar	LymMk_CT2-2	United States	Connecticut	de Waard et al 2010	HM775560	-	-	-
Lymantria dispar dispar	LymMk_CT2-3	United States	Connecticut	de Waard et al 2010	HM775559	-	-	-
Lymantria dispar dispar	LymMk_CT-3	United States	Connecticut	de Waard et al 2010	HM775562	-	-	-
Lymantria dispar dispar	LymMk_D-1	Germany	Baden-Wuerttemberg	de Waard et al 2010	HM775646	-	-	-
Lymantria dispar dispar	LymMk_E-1	Germany	Baden-Wuerttemberg	de Waard et al 2010	HM775645	-	-	-
Lymantria dispar dispar	LymMk_E-2	Germany	Baden-Wuerttemberg	de Waard et al 2010	HM775644	-	-	-
Lymantria dispar dispar	LymMk_E-3	Germany	Baden-Wuerttemberg	de Waard et al 2010	HM775643	-	-	-
Lymantria dispar dispar	LymMk_ESL-1	Slovakia	Bratislava	de Waard et al 2010	HM775581	-	-	-
Lymantria dispar dispar	LymMk_ESL-2	Slovakia	Bratislava	de Waard et al 2010	HM775580	-	-	-
Lymantria dispar dispar	LymMk_ESL-3	Slovakia	Bratislava	de Waard et al 2010	HM775579	-	-	-
Lymantria dispar dispar	LymMk_F-1	Germany	Baden-Wuerttemberg	de Waard et al 2010	HM775642	-	-	-
Lymantria dispar dispar	LymMk_F-2	Germany	Baden-Wuerttemberg	de Waard et al 2010	HM775641	-	-	-
Lymantria dispar dispar	LymMk_F-3	Germany	Baden-Wuerttemberg	de Waard et al 2010	HM775640	-	-	-
Lymantria dispar dispar	LymMk_G-1	Germany	Bavaria	de Waard et al 2010	HM775606	-	-	-
Lymantria dispar dispar	LymMk_G-2	Germany	Bavaria	de Waard et al 2010	HM775639	-	-	-
Lymantria dispar dispar	LymMk_G-3	Germany	Bavaria	de Waard et al 2010	HM775638	-	-	-
Lymantria dispar dispar	LymMk_GL-1	Germany	Hesse	de Waard et al 2010	HM775637	-	-	-
Lymantria dispar dispar	LymMk_GL-3	Germany	Hesse	de Waard et al 2010	HM775636	-	-	-
Lymantria dispar dispar	LymMk_H-1	Germany	Bavaria	de Waard et al 2010	HM775635	-	-	-
Lymantria dispar dispar	LymMk_H-2	Germany	Bavaria	de Waard et al 2010	HM775634	-	-	-
Lymantria dispar dispar	LymMk_H-3	Germany	Bavaria	de Waard et al 2010	HM775633	-	-	-
Lymantria dispar dispar	LymMk_I-1	Germany	Hesse	de Waard et al 2010	HM775632	-	-	-
Lymantria dispar dispar	LymMk_I-2	Germany	Hesse	de Waard et al 2010	HM775631	-	-	-
Lymantria dispar dispar	LymMk_I-3	Germany	Hesse	de Waard et al 2010	HM775630	-	-	-
Lymantria dispar dispar	LymMk_J-1	Germany	Hesse	de Waard et al 2010	HM775629	-	-	-
Lymantria dispar dispar	LymMk_J-2	Germany	Hesse	de Waard et al 2010	HM775628	-	-	-
Lymantria dispar dispar	LymMk_J-3	Germany	Hesse	de Waard et al 2010	HM775627	-	-	-
Lymantria dispar dispar	LymMk_JL-1	Lithuania	Kuzsin Nezijos	de Waard et al 2010	HM775603	-	-	-
Lymantria dispar dispar	LymMk_JL-2	Lithuania	Kuzsin Nezijos	de Waard et al 2010	HM775602	-	-	-
Lymantria dispar dispar	LymMk_JL-3	Lithuania	Kuzsin Nezijos	de Waard et al 2010	HM775601	-	-	-
Lymantria dispar dispar	LymMk_K-1	Switzerland	Ticino	de Waard et al 2010	HM775578	-	-	-
Lymantria dispar dispar	LymMk_K-2	Switzerland	Ticino	de Waard et al 2010	HM775577	-	-	-
Lymantria dispar dispar	LymMk_K-3	Switzerland	Ticino	de Waard et al 2010	HM775575	-	-	-
Lymantria dispar dispar	LymMk_KG-1	Greece	Curr	de Waard et al 2010	HM775613	-	-	-
Lymantria dispar dispar	LymMk_KG-2	Greece	Curr	de Waard et al 2010	HM775626	-	-	-
Lymantria dispar dispar	LymMk_L-1	Switzerland	Ticino	de Waard et al 2010	HM775574	-	-	-
Lymantria dispar dispar	LymMk_L-2	Switzerland	Ticino	de Waard et al 2010	HM775573	-	-	-
Lymantria dispar dispar	LymMk_L-3	Switzerland	Ticino	de Waard et al 2010	HM775572	-	-	-
Lymantria dispar dispar	LymMk_LAM-1	United States	New York	de Waard et al 2010	HM775558	-	-	-
Lymantria dispar dispar	LymMk_LAM-2	United States	New York	de Waard et al 2010	HM775557	-	-	-
Lymantria dispar dispar	LymMk_LAM-3	United States	New York	de Waard et al 2010	HM775556	-	-	-
Lymantria dispar dispar	LymMk_LAP-1	United States	New York	de Waard et al 2010	HM775555	-	-	-
Lymantria dispar dispar	LymMk_LAP-2	United States	New York	de Waard et al 2010	HM775553	-	-	-
Lymantria dispar dispar	LymMk_LAP-3	United States	New York	de Waard et al 2010	HM775552	-	-	-
Lymantria dispar dispar	LymMk_LB-1	United States	New York	de Waard et al 2010	HM775551	-	-	-
Lymantria dispar dispar	LymMk_LB-2	United States	New York	de Waard et al 2010	HM775550	-	-	-
Lymantria dispar dispar	LymMk_LB-3	United States	New York	de Waard et al 2010	HM775549	-	-	-
Lymantria dispar dispar	LymMk_LG-2	Latvia	-	de Waard et al 2010	HM775621	-	-	-
Lymantria dispar dispar	LymMk_LM-1	United States	New York	de Waard et al 2010	HM775548	-	-	-
Lymantria dispar dispar	LymMk_LM-2	United States	New York	de Waard et al 2010	HM775547	-	-	-
Lymantria dispar dispar	LymMk_LM-3	United States	New York	de Waard et al 2010	HM775546	-	-	-
Lymantria dispar dispar	LymMk_LO-1	United States	New York	de Waard et al 2010	HM775545	-	-	-
Lymantria dispar dispar	LymMk_LO-2	United States	New York	de Waard et al 2010	HM775544	-	-	-
Lymantria dispar dispar	LymMk_LO-3	United States	New York	de Waard et al 2010	HM775542	-	-	-
Lymantria dispar dispar	LymMk_M-1	Switzerland	Ticino	de Waard et al 2010	HM775571	-	-	-
Lymantria dispar dispar	LymMk_M-2	Switzerland	Ticino	de Waard et al 2010	HM775570	-	-	-
Lymantria dispar dispar	LymMk_M-3	Switzerland	Ticino	de Waard et al 2010	HM775569	-	-	-
Lymantria dispar dispar	LymMk_MA-1	United States	Massachusetts	de Waard et al 2010	HM775541	-	-	-
Lymantria dispar dispar	LymMk_MA-2	United States	Massachusetts	de Waard et al 2010	HM775540	-	-	-
Lymantria dispar dispar	LymMk_MA-3	United States	Massachusetts	de Waard et al 2010	HM775539	-	-	-
Lymantria dispar dispar	LymMk_N-1	France	Indre-et-Loire	de Waard et al 2010	HM775665	-	-	-
Lymantria dispar dispar	LymMk_NC-1	United States	North Carolina	de Waard et al 2010	HM775568	-	-	-
Lymantria dispar dispar	LymMk_NC-2	United States	North Carolina	de Waard et al 2010	HM775567	-	-	-
Lymantria dispar dispar	LymMk_NC-3	United States	North Carolina	de Waard et al 2010	HM775566	-	-	-
Lymantria dispar dispar	LymMk_O-1	France	Indre-et-Loire	de Waard et al 2010	HM775664	-	-	-
Lymantria dispar dispar	LymMk_O-2	France	Indre-et-Loire	de Waard et al 2010	HM775663	-	-	-
Lymantria dispar dispar	LymMk_O-3	France	Indre-et-Loire	de Waard et al 2010	HM775662	-	-	-
Lymantria dispar dispar	LymMk_P-1	France	Indre-et-Loire	de Waard et al 2010	HM775661	-	-	-
Lymantria dispar dispar	LymMk_P-2	France	Indre-et-Loire	de Waard et al 2010	HM775660	-	-	-
Lymantria dispar dispar	LymMk_P-3	France	Indre-et-Loire	de Waard et al 2010	HM775659	-	-	-
Lymantria dispar dispar	LymMk_PA-1	Poland	Poznan Region	de Waard et al 2010	HM775600	-	-	-
Lymantria dispar dispar	LymMk_PA-2	Poland	Poznan Region	de Waard et al 2010	HM775599	-	-	-
Lymantria dispar dispar	LymMk_PB-1	Poland	Poznan Region	de Waard et al 2010	HM775598	-	-	-
Lymantria dispar dispar	LymMk_PB-2	Poland	Poznan Region	de Waard et al 2010	HM775597	-	-	-
Lymantria dispar dispar	LymMk_PB-3	Poland	Poznan Region	de Waard et al 2010	HM775596	-	-	-
Lymantria dispar dispar	LymMk_PC-1	Poland	Poznan Region	de Waard et al 2010	HM775610	-	-	-
Lymantria dispar dispar	LymMk_PC-2	Poland	Poznan Region	de Waard et al 2010	HM775609	-	-	-
Lymantria dispar dispar	LymMk_PC-3	Poland	Poznan Region	de Waard et al 2010	HM775595	-	-	-
Lymantria dispar dispar	LymMk_PP-1	Portugal	Portalegre	de Waard et al 2010	HM775594	-	-	-
Lymantria dispar dispar	LymMk_PP-2	Portugal	Portalegre	de Waard et al 2010	HM775593	-	-	-
Lymantria dispar dispar	LymMk_PP-3	Portugal	Portalegre	de Waard et al 2010	HM775592	-	-	-
Lymantria dispar dispar	LymMk_Q-1	Austria	Vienna	de Waard et al 2010	HM775587	-	-	-
Lymantria dispar dispar	LymMk_Q-2	Austria	Vienna	de Waard et al 2010	HM775576	-	-	-
Lymantria dispar dispar	LymMk_Q-3	Austria	Vienna	de Waard et al 2010	HM775565	-	-	-
Lymantria dispar dispar	LymMk_R-1	Austria	Vienna	de Waard et al 2010	HM775554	-	-	-
Lymantria dispar dispar	LymMk_R-2	Austria	Vienna	de Waard et al 2010	HM775543	-	-	-
Lymantria dispar dispar	LymMk_R-3	Austria	Vienna	de Waard et al 2010	HM775620	-	-	-
Lymantria dispar dispar	LymMk_S-1	Austria	Burgenland	de Waard et al 2010	HM775619	-	-	-
Lymantria dispar dispar	LymMk_S-2	Austria	Burgenland	de Waard et al 2010	HM775699	-	-	-
Lymantria dispar dispar	LymMk_S-3	Austria	Burgenland	de Waard et al 2010	HM775698	-	-	-
Lymantria dispar dispar	LymMk_T-1	France	Alsace	de Waard et al 2010	HM775658	-	-	-
Lymantria dispar dispar	LymMk_T-2	France	Alsace	de Waard et al 2010	HM775657	-	-	-
Lymantria dispar dispar	LymMk_T-3	France	Alsace	de Waard et al 2010	HM775656	-	-	-
Lymantria dispar dispar	LymMk_UB-1	Bulgaria	Sofiya-Grad	de Waard et al 2010	HM775697	-	-	-
Lymantria dispar dispar	LymMk_UB-2	Bulgaria	Sofiya-Grad	de Waard et al 2010	HM775612	-	-	-
Lymantria dispar dispar	LymMk_UB-3	Bulgaria	Sofiya-Grad	de Waard et al 2010	HM775696	-	-	-
Lymantria dispar dispar	LymMk_WV-1	United States	West Virginia	de Waard et al 2010	HM775538	-	-	-
Lymantria dispar dispar	LymMk_WV-2	United States	West Virginia	de Waard et al 2010	HM775622	-	-	-
Lymantria dispar dispar	LymMk_WV-3	United States	West Virginia	de Waard et al 2010	HM775624	-	-	-
Lymantria dispar dispar	SPI B-5-2 A	Canada	British Columbia	de Waard et al 2010	HM775749	-	-	-
Lymantria dispar dispar	SPI C-02-02 A	Canada	British Columbia	de Waard et al 2010	HM775748	-	-	-
Lymantria dispar dispar	SPI C-02-17 A	Canada	British Columbia	de Waard et al 2010	HM775747	-	-	-
Lymantria dispar dispar	SPI I-3-17 A	Canada	British Columbia	de Waard et al 2010	HM775746	-	-	-
Lymantria dispar dispar	SPI L-2-5 A	Canada	British Columbia	de Waard et al 2010	HM775745	-	-	-
Lymantria dispar dispar	SPI V-23-8 A	Canada	British Columbia	de Waard et al 2010	HM775732	-	-	-
Lymantria dispar dispar	SPI V-23-8 B	Canada	British Columbia	de Waard et al 2010	HM775731	-	-	-
Lymantria dispar dispar	SPI V-24-3 A	Canada	British Columbia	de Waard et al 2010	HM775730	-	-	-
Lymantria dispar dispar	SPI V-25-5 A	Canada	British Columbia	de Waard et al 2010	HM775729	-	-	-
Lymantria dispar dispar	SPI V-26-5 A	Canada	British Columbia	de Waard et al 2010	HM775728	-	-	-
Lymantria dispar dispar	SPI V-90-2 A	Canada	British Columbia	de Waard et al 2010	HM775726	-	-	-
Lymantria dispar dispar	SPI V-90-2 B	Canada	British Columbia	de Waard et al 2010	HM775727	-	-	-
Lymantria dispar dispar	SPI V-90-3 A	Canada	British Columbia	de Waard et al 2010	HM775725	-	-	-
Lymantria dispar dispar	SPI V-92-1 B	Canada	British Columbia	de Waard et al 2010	HM775724	-	-	-
Lymantria dispar dispar	SPI V-92-1 C	Canada	British Columbia	de Waard et al 2010	HM775723	-	-	-
Lymantria dispar dispar	SPI V-92-1 D	Canada	British Columbia	de Waard et al 2010	HM775722	-	-	-
Lymantria dispar dispar	SPI V-92-1 E	Canada	British Columbia	de Waard et al 2010	HM775721	-	-	-
Lymantria dispar dispar	SPI V-92-3 A	Canada	British Columbia	de Waard et al 2010	HM775720	-	-	-
Lymantria dispar dispar	SPI V-92-3 B	Canada	British Columbia	de Waard et al 2010	HM775719	-	-	-
Lymantria dispar dispar	SPI V-93-1 A	Canada	British Columbia	de Waard et al 2010	HM775718	-	-	-
Lymantria dispar dispar	SPI V-93-2 A	Canada	British Columbia	de Waard et al 2010	HM775717	-	-	-
Lymantria dispar dispar	SPI V-93-2 B	Canada	British Columbia	de Waard et al 2010	HM775716	-	-	-
Lymantria dispar dispar	SPI V-94-1 B	Canada	British Columbia	de Waard et al 2010	HM775715	-	-	-
Lymantria dispar dispar	SPI V-94-1 C	Canada	British Columbia	de Waard et al 2010	HM775714	-	-	-
Lymantria dispar dispar	SPI V-94-1 D	Canada	British Columbia	de Waard et al 2010	HM775713	-	-	-
Lymantria dispar dispar	SPI V-98-2 A	Canada	British Columbia	de Waard et al 2010	HM775712	-	-	-
Lymantria dispar dispar	SPI W-17-1 A	Canada	British Columbia	de Waard et al 2010	HM775711	-	-	-
Lymantria dispar dispar	SPI X-39-1 A	Canada	British Columbia	de Waard et al 2010	HM775710	-	-	-
Lymantria dispar dispar	ww01213	United States	Virginia	de Waard et al 2010	HM775736	-	-	-
Lymantria dispar dispar	ww01214	United States	Maryland	de Waard et al 2010	HM775735	-	-	-
Lymantria dispar dispar	ww01215	United States	Maryland	de Waard et al 2010	HM775734	-	-	-
Lymantria dispar dispar	ww01216	United States	Maryland	de Waard et al 2010	HM775733	-	-	-
OTLS
Lymantria monacha	-	Japan	Hokkaido	Bogdanowicz et al. 2000	AF075277	-	-	-
Lymantria monacha	AGM36	Japan	Matsumoto, Nagano	This study	KX436591	-	-	-
Lymantria monacha	AGM65	Japan	Shirahone, Matsumoto, Nagano	This study	KX436592	-	-	-
Lymantria monacha	AGM66	Japan	Utsukushigahara, Nagano	This study	KX436593	-	-	-
Lymantria monacha	AGM67	Japan	Shirahone, Matsumoto, Nagano	This study	KX436594	-	-	-
Lymantria monacha	Bogda-MON-71	Japan	Hokkaido	Bogdanowicz et al. 2000	-	BOGDA071-08	-	-
Lymantria monacha	CFIA-LEP0091	South Korea	Sandong-myun, Jirisan	This study	KX436364	MPGM281-15	-	-
Lymantria monacha	CFIA-LEP0101	South Korea	Toji-myun Jirisan	This study	KX436244	MPGM007-15	-	-
Lymantria monacha	CFIA-LEP0249	Taiwan	Taipingshan, Ilan Co.	This study	KX436294	MPGM155-15	-	-
Lymantria monacha	CFIA-LEP0263	China	-	This study	KX436303	MPGM169-15	-	-
Lymantria monacha	CFIA-LEP0341	China	Jiangxi, Wuyi shan	This study	KX436389	MPGM341-15	-	-
Lymantria monacha	CFIA-LEP0396	Finland	-	This study	KX436393	MPGM396-15	-	-
Lymantria monacha	CFIA-LEP0414	Russia	Bashkortostan, Beloretsky district, North Kraka Mts., Sargaja river	This study	KX436408	MPGM414-15	-	-
Lymantria monacha	CFIA-LEP0415	Russia	Bashkortostan, Katav-Ivanovsky district, near Tjuljuk village	This study	KX436409	MPGM415-15	-	-
Lymantria monacha	CFIA-LEP0418	Russia	Bashkortostan, Beloretsky district, North Kraka Mts., Sargaja river	This study	KX436412	MPGM418-15	-	-
Lymantria monacha	CFIA-LEP0419	Russia	Bashkortostan, Beloretsky district, Belaya river	This study	KX436413	MPGM419-15	-	-
Lymantria monacha	CFIA-LEP0420	Russia	Bashkortostan, Beloretsky district, North Kraka Mts., Sargaja river	This study	KX436414	MPGM420-15	-	-
Lymantria monacha	CFIA-LEP0421	Russia	Bashkortostan, Katav-Ivanovsky district, near Tjuljuk village	This study	KX436415	MPGM421-15	-	-
Lymantria monacha	CFIA-LEP0424	Russia	Bashkortostan, Meleuzovsky district, Nugush river, near Verhnyi Nugush village	This study	KX436417	MPGM424-15	-	-
Lymantria monacha	CFIA-LEP0425	Russia	Bashkortostan, Beloretsky district, North Kraka Mts., Sargaja river	This study	KX436418	MPGM425-15	-	-
Lymantria monacha	CFIA-LEP0428	Russia	Bashkortostan, Beloretsky district, North Kraka Mts., Sargaja river	This study	KX436421	MPGM428-15	-	-
Lymantria monacha	CFIA-LEP0432	Russia	Bashkortostan, Burzyansky district, near Galikberovo village	This study	KX436425	MPGM432-15	-	-
Lymantria monacha	CFIA-LEP0487	Czech Republic	Spindleruv Mlyn	This study	KX436472	MPGM487-15	-	-
Lymantria monacha	CFIA-LEP0490	Czech Republic	Spindleruv Mlyn	This study	KX436473	MPGM490-15	-	-
Lymantria monacha	CFIA-LEP0491	Czech Republic	Spindleruv Mlyn	This study	KX436474	MPGM491-15	-	-
Lymantria monacha	CFIA-LEP0494	Slovakia	Gbely	This study	KX436477	MPGM494-15	-	-
Lymantria monacha	CFS14	Czech republic	-	This study	KX436595	-	-	-
Lymantria monacha	Ly202	South Korea	Kangwon-do	Armstrong and Ball 2005	DQ116145	-	-	-
Lymantria monacha	Ly203	South Korea	Kangwon-do	Armstrong and Ball 2005	DQ116146	-	-	-
Lymantria monacha	Ly208	South Korea	Kangwon-do	Armstrong and Ball 2005	DQ116147	-	-	-
Lymantria monacha	Ly214	South Korea	Kangwon-do	Armstrong and Ball 2005	DQ116148	-	-	-
Lymantria monacha	Ly217	South Korea	Kangwon-do	Armstrong and Ball 2005	DQ116149	-	-	-
Lymantria monacha	Ly238	Japan	Honshu	Armstrong and Ball 2005	DQ116135	-	-	-
Lymantria monacha	Ly239	Japan	Honshu	Armstrong and Ball 2005	DQ116124	-	-	-
Lymantria monacha	Ly240	Japan	Honshu	Armstrong and Ball 2005	DQ116164	-	-	-
Lymantria monacha	Ly247	Japan	Honshu	Armstrong and Ball 2005	DQ116089	-	-	-
Lymantria monacha	Ly342	Japan	Honshu	Armstrong and Ball 2005	DQ116154	-	-	-
Lymantria monacha	Ly343	Japan	Honshu	Armstrong and Ball 2005	DQ116156	-	-	-
Lymantria monacha	Ly347	Japan	Honshu	Armstrong and Ball 2005	DQ116155	-	-	-
Lymantria monacha	Ly385	Japan	Honshu	Armstrong and Ball 2005	DQ116101	-	-	-
Lymantria monacha	Ly389	Japan	Honshu	Armstrong and Ball 2005	DQ116097	-	-	-
Lymantria monacha	Ly392	Japan	Honshu	Armstrong and Ball 2005	DQ116102	-	-	-
Lymantria monacha	Ly394	Japan	Honshu	Armstrong and Ball 2005	DQ116113	-	-	-
Lymantria monacha	Ly395	Japan	Honshu	Armstrong and Ball 2005	DQ116114	-	-	-
Lymantria monacha	Ly396	Japan	Honshu	Armstrong and Ball 2005	DQ116132	-	-	-
Lymantria monacha	Ly401	Japan	Honshu	Armstrong and Ball 2005	DQ116137	-	-	-
Lymantria monacha	Ly43	Poland	-	Armstrong and Ball 2005	DQ116127	-	-	-
Lymantria monacha	Ly44_2	Czech Republic	-	Armstrong and Ball 2005	DQ116091	-	-	-
Lymantria monacha	Ly64	Poland	-	Armstrong and Ball 2005	DQ116143	-	-	-
Lymantria monacha	Ly65	Poland	-	Armstrong and Ball 2005	DQ116144	-	-	-
Lymantria monacha	Ly65_2	Poland	-	Armstrong and Ball 2005	DQ116095	-	-	-
Lymantria monacha	Ly67	Czech Republic	-	Armstrong and Ball 2005	DQ116129	-	-	-
Lymantria monacha	Ly68	Czech Republic	-	Armstrong and Ball 2005	DQ116134	-	-	-
Lymantria monacha	Ly69	Czech Republic	-	Armstrong and Ball 2005	DQ116123	-	-	-
Lymantria monacha	Ly70	Czech Republic	-	Armstrong and Ball 2005	DQ116130	-	-	-
Lymantria monacha	LymMk_CZP-1	Czech Republic	-	de Waard et al 2010	HM775818	-	-	-
Lymantria monacha	LymMk_CZP-2	Czech Republic	-	de Waard et al 2010	HM775817	-	-	-
Lymantria monacha	LymMk_CZP-3	Czech Republic	-	de Waard et al 2010	HM775816	-	-	-
Lymantria monacha	LymMk_CZP-4	Czech Republic	-	de Waard et al 2010	HM775791	-	-	-
Lymantria monacha	LymMk_CZP-5	Czech Republic	-	de Waard et al 2010	HM775815	-	-	-
Lymantria monacha	LymMk_CZP-6	Czech Republic	-	de Waard et al 2010	HM775814	-	-	-
Lymantria monacha	LymMk_JIP-1	Japan	-	de Waard et al 2010	HM775813	-	-	-
Lymantria monacha	LymMk_JIP-2	Japan	-	de Waard et al 2010	HM775812	-	-	-
Lymantria monacha	LymMk_JIP-3	Japan	-	de Waard et al 2010	HM775811	-	-	-
Lymantria monacha	LymMk_JIP-4	Japan	-	de Waard et al 2010	HM775810	-	-	-
Lymantria monacha	PaA-08-534	Russia	Primorskiy Kray	de Waard et al 2010	HM775807	-	-	-
Lymantria monacha	PaA-08-535	Russia	Primorskiy Kray	de Waard et al 2010	HM775806	-	-	-
Lymantria monacha	PaA-08-536	Russia	Primorskiy Kray	de Waard et al 2010	HM775805	-	-	-
Lymantria monacha	PaA-08-537	Russia	Primorskiy Kray	de Waard et al 2010	HM775808	-	-	-
Lymantria monacha	PaA-08-538	Russia	Primorskiy Kray	de Waard et al 2010	HM775804	-	-	-
Lymantria monacha	PaA-08-539	Russia	Primorskiy Kray	de Waard et al 2010	HM775803	-	-	-
Lymantria monacha	PaA-08-540	Russia	Primorskiy Kray	de Waard et al 2010	HM775802	-	-	-
Lymantria monacha	PaA-08-541	Russia	Primorskiy Kray	de Waard et al 2010	HM775801	-	-	-
Lymantria monacha	PaA-08-542	Russia	Primorskiy Kray	de Waard et al 2010	HM775800	-	-	-
Lymantria monacha	PaA-08-543	Russia	Primorskiy Kray	de Waard et al 2010	HM775799	-	-	-
Lymantria monacha	PaA-08-544	Russia	Primorskiy Kray	de Waard et al 2010	HM775798	-	-	-
Lymantria monacha	PaA-08-545	Russia	Primorskiy Kray	de Waard et al 2010	HM775809	-	-	-
Lymantria monacha	PaA-08-546	Russia	Primorskiy Kray	de Waard et al 2010	HM775797	-	-	-
Lymantria monacha	PaA-08-547	Russia	Primorskiy Kray	de Waard et al 2010	HM775796	-	-	-
Lymantria monacha	PaA-08-548	Russia	Primorskiy Kray	de Waard et al 2010	HM775795	-	-	-
Lymantria monacha	PaA-08-549	Russia	Primorskiy Kray	de Waard et al 2010	HM775794	-	-	-
Lymantria monacha	PaA-08-550	Russia	Primorskiy Kray	de Waard et al 2010	HM775793	-	-	-
Lymantria monacha	PaA-08-551	Russia	Primorskiy Kray	de Waard et al 2010	HM775792	-	-	-
Lymantria fumida	AGM69	USA	Newark, Delaware	This study	KX436569	-	-	-
Lymantria fumida	Lepi679	Japan	Honshu	Armstrong and Ball 2005	DQ116190	-	-	-
Lymantria fumida	Ly248	Japan	Honshu	Armstrong and Ball 2005	DQ116172	-	-	-
Lymantria fumida	Ly248_2	Japan	Honshu	Armstrong and Ball 2005	DQ116191	-	-	-
Lymantria fumida	ww01273	Japan	Honshu	de Waard et al 2010	HM775764	-	-	-
Lymantria fumida	ww01283	Japan	Iwate	de Waard et al 2010	HM775763	-	-	-
Lymantria fumida	ww01284	Japan	Honshu	de Waard et al 2010	HM775762	-	-	-
Lymantria mathura	AGM02	Japan	Tenryu, Nagano	This study	KX436573	-	-	-
Lymantria mathura	AGM04	Japan	Takizawa, Iwate	This study	KX436574	-	-	-
Lymantria mathura	AGM49	Japan	Takizawa, Iwate	This study	KX436575	-	-	-
Lymantria mathura	AGM50	Japan	Tenryu, Nagano	This study	KX436576	-	-	-
Lymantria mathura	AGM51	Japan	Mt. Kushigata, Fujikawa, Yamanashi	This study	KX436577	-	-	-
Lymantria mathura	AGM54	China	Weixi, Yunnan	This study	KX436578	-	-	-
Lymantria mathura	AGM55	Japan	Kimitsu, Chiba	This study	KX436579	-	-	-
Lymantria mathura	AGM56	Japan	Utsukushigahara, Nagano	This study	KX436580	-	-	-
Lymantria mathura	AGM57	Japan	Mt. Kushigata, Fujikawa, Yamanashi	This study	KX436581	-	-	-
Lymantria mathura	AGM58	Russia	Vostochny, Primorsky Kray	This study	KX436582	-	-	-
Lymantria mathura	AGM59	Tibet	-	This study	KX436583	-	-	-
Lymantria mathura	AGM60	Japan	Takizawa, Iwate	This study	KX436584	-	-	-
Lymantria mathura	AGM61	Japan	Utsukushigahara, Nagano	This study	KX436585	-	-	-
Lymantria mathura	AGM62	South Korea	Kangwon	This study	KX436586	-	-	-
Lymantria mathura	AGM63	China	Weixi, Yunnan	This study	KX436587	-	-	-
Lymantria mathura	AGM70	Japan	Takizawa, Iwate	This study	KX436588	-	-	-
Lymantria mathura	CFIA-LEP0095	South Korea	Seolcheon-myeon	This study	KX436367	MPGM285-15	-	-
Lymantria mathura	CFIA-LEP0096	South Korea	Sannae-myun, Jirisan	This study	KX436240	MPGM002-15	-	-
Lymantria mathura	CFIA-LEP0097	South Korea	Gwangui-myun Jirisan	This study	KX436241	MPGM003-15	-	-
Lymantria mathura	CFIA-LEP0098	South Korea	Mt. Mani	This study	KX436242	MPGM004-15	-	-
Lymantria mathura	CFIA-LEP0100	South Korea	Mt. Taewhasan	This study	KX436243	MPGM006-15	KX436144	-
Lymantria mathura	CFIA-LEP0510	Japan	Akashina	This study	KX436480	MPGM510-15	-	-
Lymantria mathura	CFIA-LEP0560	Canada	Vancouver	This study	KX436491	MPGM560-16	-	-
Lymantria mathura	CFIA-LEP0599	Canada	North Vancouver	This study	KX436502	MPGM599-16	-	-
Lymantria mathura	CFIA-LEP0603	Canada	Vancouver	This study	KX436504	MPGM603-16	-	-
Lymantria mathura	CFS13		-	This study	KX436589	-	-	-
Lymantria mathura	Ly121	South Korea	Kangwon-do	Armstrong and Ball 2005	DQ116159	-	-	-
Lymantria mathura	Ly123	South Korea	Kangwon-do	Armstrong and Ball 2005	DQ116160	-	-	-
Lymantria mathura	Ly125	South Korea	Yongau-ri	Armstrong and Ball 2005	DQ116161	-	-	-
Lymantria mathura	Ly99	South Korea	Kangwon-do	Armstrong and Ball 2005	DQ116157	-	-	-
Lymantria mathura	PaA-08-1182	Japan	Fukushima	de Waard et al 2010	HM775774	-	-	-
Lymantria mathura	PaA-08-1183	Japan	Fukushima	de Waard et al 2010	HM775773	-	-	-
Lymantria mathura	PaA-08-1184	Japan	Fukushima	de Waard et al 2010	HM775772	-	-	-
Lymantria mathura	PaA-08-1185	Japan	Fukushima	de Waard et al 2010	HM775771	-	-	-
Lymantria mathura	PaA-08-1186	Japan	Fukushima	de Waard et al 2010	HM775770	-	-	-
Lymantria mathura	PaA-08-1187	Japan	Fukushima	de Waard et al 2010	HM775769	-	-	-
Lymantria mathura	PaA-08-1188	Japan	Fukushima	de Waard et al 2010	HM775768	-	-	-
Lymantria mathura	PaA-08-524	Russia	Primorskiy Kray	de Waard et al 2010	HM775784	-	-	-
Lymantria mathura	PaA-08-525	Russia	Primorskiy Kray	de Waard et al 2010	HM775783	-	-	-
Lymantria mathura	PaA-08-526	Russia	Primorskiy Kray	de Waard et al 2010	HM775782	-	-	-
Lymantria mathura	PaA-08-527	Russia	Primorskiy Kray	de Waard et al 2010	HM775781	-	-	-
Lymantria mathura	PaA-08-528	Russia	Primorskiy Kray	de Waard et al 2010	HM775780	-	-	-
Lymantria mathura	PaA-08-529	Russia	Primorskiy Kray	de Waard et al 2010	HM775779	-	-	-
Lymantria mathura	PaA-08-530	Russia	Primorskiy Kray	de Waard et al 2010	HM775778	-	-	-
Lymantria mathura	PaA-08-531	Russia	Primorskiy Kray	de Waard et al 2010	HM775777	-	-	-
Lymantria mathura	PaA-08-532	Russia	Primorskiy Kray	de Waard et al 2010	HM775776	-	-	-
Lymantria mathura	PaA-08-533	Russia	Primorskiy Kray	de Waard et al 2010	HM775775	-	-	-
Lymantria mathura	ww01217	Japan	Hokkaido	de Waard et al 2010	HM775789	-	-	-
Lymantria mathura	ww01218	Japan	Honshu	de Waard et al 2010	HM775788	-	-	-
Lymantria mathura	ww01219	Japan	Honshu	de Waard et al 2010	HM775787	-	-	-
Lymantria mathura	ww01220	South Korea	nr. Soraksan NP Campground	de Waard et al 2010	HM775786	-	-	-
Lymantria mathura	ww01228	Japan	Hokkaido	de Waard et al 2010	HM775785	-	-	-
Lymantria xylina	-	Taiwan	T'ai-pei Hsien	Bogdanowicz et al. 2000	AF075276	-	-	-
Lymantria xylina	AGM42	Japan	Kimitsu, Chiba	This study	KX436599	-	-	-
Lymantria xylina	Bogda-XYL-69	Taiwan	Taipei	Bogdanowicz et al. 2000	-	BOGDA069-08	-	-
Lymantria xylina	CFIA-LEP0007	Canada	Alberta	This study	KX436315	MPGM197-15	-	-
Lymantria xylina	CFIA-LEP0253	Taiwan	Fushan Botanical Garden, Ilan Co.	This study	KX436295	MPGM159-15	-	-
Lymantria xylina	CFIA-LEP0311	Japan	Okinawa	This study	KX436387	MPGM311-15	-	-
Lymantria xylina	CFIA-LEP0314	Taiwan	Suao	This study	KX436388	MPGM314-15	-	-
Lymantria xylina	CFIA-LEP0528	Canada	-	This study	KX436488	MPGM528-16	-	-
Lymantria xylina	CFIA-LEP0530	Canada	-	This study	KX436489	MPGM530-16	-	-
Lymantria xylina	CFIA-LEP0584	Canada	North Vancouver	This study	KX436495	MPGM584-16	-	-
Lymantria xylina	CFIA-LEP0585	Canada	North Vancouver	This study	KX436496	MPGM585-16	-	-
Lymantria xylina	CFIA-LEP0586	Canada	North Vancouver	This study	KX436497	MPGM586-16	-	-
Lymantria xylina	CFIA-LEP0587	Canada	North Vancouver	This study	KX436498	MPGM587-16	-	-
Lymantria xylina	Ly104	Taiwan	Kuan-in	Armstrong and Ball 2005	DQ116158	-	-	-
Lymantria xylina	Ly105	Taiwan	Kuan-in	Armstrong and Ball 2005	DQ116170	-	-	-
Lymantria xylina	Ly106	Taiwan	Kuan-in	Armstrong and Ball 2005	DQ116171	-	-	-
Lymantria lucescens	AGM45	Japan	Azumino, Nagano	This study	KX436570	-	-	-
Lymantria lucescens	AGM46	Japan	Azumino, Nagano	This study	KX436571	-	-	-
Lymantria lucescens	AGM68	Japan	Tenryu, Nagano	This study	KX436572	-	-	-
Lymantria lucescens	CFIA-LEP0093	South Korea	Mt. Sobaek	This study	KX436365	MPGM283-15	-	-
Lymantria lucescens	CFIA-LEP0094	South Korea	Mt. Mani	This study	KX436366	MPGM284-15	-	-
Lymantria lucescens	Lepi1114	Japan	Honshu	Armstrong and Ball 2005	DQ149569	-	-	-
Lymantria lucescens	Ly184	Japan	Honshu	Armstrong and Ball 2005	DQ116177	-	-	-
Lymantria lucescens	ww01261	Japan	Honshu	de Waard et al 2010	HM775767	-	-	-
Lymantria lucescens	ww01262	Japan	Honshu	de Waard et al 2010	HM775766	-	-	-
Related species
Lymantria atemeles	AGM169	Thailand	Phayao	This study	KX436602	-	-	-
Lymantria atemeles	CFIA-LEP0118	Thailand	Nakhon Ratchasima	This study	KX436245	MPGM024-15	-	-
Lymantria atemeles	CFIA-LEP0119	Thailand	Nakhon Ratchasima	This study	KX436246	MPGM025-15	-	-
Lymantria atemeles	Lepi453	Thailand	Kampaeng Saen	Armstrong and Ball 2005	DQ116184	-	-	-
Lymantria atemeles	ww01238	Thailand	Kampaeng Saen	de Waard et al 2010	HM77534	-	-	-
Lymantria atemeles	ww01239	Thailand	Kampaeng Saen	de Waard et al 2010	HM77533	-	-	-
Lymantria atemeles	ww01240	Thailand	Kampaeng Saen	de Waard et al 2010	HM77532	-	-	-
Lymantria atemeles	ww02253	Thailand	Chantabury	de Waard et al 2010	HM77535	-	-	-
Lymantria bantaizana	AGM71	Japan	Utsukushigahara, Nagano	This study	KX436537	-	-	-
Lymantria bantaizana	Ly228	Japan	Honshu	Armstrong and Ball 2005	DQ116178	-	-	-
Lymantria bantaizana	Ly230	Japan	Honshu	Armstrong and Ball 2005	DQ116163	-	-	-
Lymantria bantaizana	Ly231	Japan	Honshu	Armstrong and Ball 2005	DQ116168	-	-	-
Lymantria bantaizana	Ly232	Japan	Honshu	Armstrong and Ball 2005	DQ116173	-	-	-
Lymantria concolor	AGM164	Thailand	Kanchanaburi	This study	KX436601	-	-	-
Lymantria concolor	CFIA-LEP0155	Bhutan	Mo Chu River	This study	KX436254	MPGM061-15	-	-
Lymantria concolor	CFIA-LEP0256	Taiwan	Guanwu, Miaoli Co.	This study	KX436296	MPGM162-15	-	-
Lymantria concolor	CFIA-LEP0393	China	-	This study	KX436392	MPGM393-15	-	-
Lymantria concolor	ww01279	Nepal	Jiri	de Waard et al 2010	HM775537		-	-
Lymantria minimonis	AGM40	Japan	Tenryu, Nagano	This study	KX436590	-	-	-
Lymantria minimonis	AYK-04-5397	Japan	Yamanashi-ken	de Waard et al 2010	HM775790	-	-	-
Lymantria obfuscata*	-	India	Jammu and Kashmir	Bogdanowicz et al. 2000	AF075275	-	-	-
Lymantria obfuscata*	Bogda-OBF-67	India	Kashmir	Bogdanowicz et al. 2000	-	BOGDA067-08	-	-
Lymantria obfuscata*	CFIA-LEP0260	Afghanistan	-	This study	KX436300	MPGM166-15	-	-
Lymantria obfuscata*	CFIA-LEP0261	Afghanistan	-	This study	KX436301	MPGM167-15	-	-
Lymantria obfuscata*	CFIA-LEP0262	India	Sonawag	This study	KX436302	MPGM168-15	-	-
Lymantria obfuscata*	Lepi1024	India	Himachal Pradesh	Armstrong and Ball 2005	DQ155599	-	-	-
Lymantria obfuscata*	Lepi484	India	-	Armstrong and Ball 2005	DQ116186	-	-	-
Lymantria obfuscata*	Lepi485	India	-	Armstrong and Ball 2005	DQ116187	-	-	-
Lymantria obfuscata*	Lepi486	India	-	Armstrong and Ball 2005	DQ116188	-	-	-
Lymantria obfuscata*	ww01271	India	Kulu Val	de Waard et al 2010	HM775826	-	-	-
Lymantria obfuscata*	ww01272	India	Kulu Val	de Waard et al 2010	HM775825	-	-	-
Lymantria subpallida*	ww01221	Taiwan	Wulai	de Waard et al 2010	HM775848	-	-	-
Lymantria subpallida*	ww01222	Taiwan	Wulai	de Waard et al 2010	HM775847	-	-	-
Lymantria subpallida*	ww01223	Taiwan	Shek Kong	de Waard et al 2010	HM775846	-	-	-
Orgyia thyellina	AGM134	Japan	Kurashiki, Okayama	This study	KX436600	-	-	-
Orgyia thyellina	AYK-04-5327	Japan	Chubu Yamanashi-ken	Unpublished	KF491961	-	-	-
Orgyia anartoides*	10ANIC-01523	Australia	Canberra	Unpublished	HQ921478	-	-	-
Leucoma salicis	AGM89	Canada	Sheridan Lake, British Columbia	This study	KX436528	-	-	-
Leucoma salicis	AGM90	Canada	Sheridan Lake, British Columbia	This study	KX436529	-	-	-
Leucoma salicis	AGM93	Japan	Omachi, Nagano	This study	KX436530	-	-	-
Leucoma salicis	AGM94	Japan	Sapporo, Hokkaido	This study	KX436531	-	-	-
Leucoma salicis	AGM95	China	Tongzhou, Beijing	This study	KX436532	-	-	-
Leucoma salicis	BC ZSM Lep 27173	Germany	Bavaria	Hausmann et al 2011	GU707171	-	-	-
Leucoma salicis	CFIA-LEP0375	Finland	-	This study	KX436390	MPGM375-15	-	-
Leucoma salicis	CFIA-LEP0506	Slovakia	Kezmarok	This study	KX436479	MPGM506-15	-	-
Leucoma candida*	YX01	China	-	Unpublished	KJ562201	-	-	-
Arctornis I-nigrum	AGM138	Japan	Shirahone, Matsumoto, Nagano	This study	KX436514	-	-	-
Arctornis I-nigrum	AGM139	South Korea	Gwangyang	This study	KX436515	-	-	-
Arctornis I-nigrum	BC ZSM Lep 28266	Germany	Bavaria	Hausmann et al 2011	GU707347	-	-	-
Arctornis I-nigrum	CFIA-LEP0505	Czech Republic	Martinice u Votic	This study	KX436478	MPGM505-15	-	-
Calliteara abietis	AGM107	Japan	Kami-Hikawa pass, Yamanachi	This study	KX436516	-	-	-
Calliteara abietis	BC ZSM Lep 27172	Germany	Bavaria	Hausmann et al 2011	GU707170	-	-	-
Calliteara pudibunda	AGM115	Japan	Kami-Hikawa pass, Yamanachi	This study	KX436517	-	-	-
Calliteara pudibunda	AGM116	Japan	Motegi, Haga, Tochigi	This study	KX436518	-	-	-
Calliteara pudibunda	AGM117	Japan	Kami-Hikawa pass, Yamanachi	This study	KX436519	-	-	-
Calliteara pudibunda	BC ZSM Lep 31789	Germany	Bavaria	Hausmann et al 2011	HQ957219	-	-	-
Calliteara pseudoabietis*	KFIP-Lepi-039	-	-	Unpublished	JN087403	-	-	-
Cifuna locuples	AGM127	China	Weixi, Yunnan	This study	KX436520	-	-	-
Cifuna locuples	AGM128	Japan	Shirahone, Matsumoto, Nagano	This study	KX436521	-	-	-
Cifuna locuples	AGM129	Japan	Motegi, Haga, Tochigi	This study	KX436522	-	-	-
Cifuna locuples	AGM130	Japan	Takizawa, Iwate	This study	KX436523	-	-	-
Cifuna locuples	AGM131	Japan	Mt. Kushigata, Fujikawa, Yamanashi	This study	KX436524	-	-	-
Cifuna locuples	AGM132	South Korea	Gwangyang	This study	KX436525	-	-	-
Cifuna locuples	AYK-04-5732	Japan	Chubu Yamanashi-ken	Unpublished	KF491634	-	-	-
Euproctis similis	AGM121	Japan	Omachi, Nagano	This study	KX436526	-	-	-
Euproctis similis	AGM124	South Korea	Inje, Gangwon	This study	KX436527	-	-	-
Euproctis similis	MM03695	Finland	Uusimaa	Zahiri et al 2014	HM872108	-	-	-
Euproctis chrysorrhoea*	EF_D_ROM_N061_N	Romania	Moldavia	Zahiri et al 2014	HQ937836	-	-	-
Euproctis subflava*	KFIP-Lepi-016	-	-	Unpublished	JN087380	-	-	-
Hylesia nigricans*	BC-CGCM-6.082	Argentina	Entre Rios	Unpublished	JX216168	-	-	-
† These specimens were not formally keyed down to the subspecies level by a taxonomist. In most cases, however, a barcode-based assignment to either EGM or AGM (L. dispar asiatica/L. dispar japonica) is possible.
Some of these specimens were used for the FS1 assay (Table 4).
* These species/specimens were not included in the validation tests presented here but their COI-5P sequences were used in alignments aimed at selecting appropriate primers and probes for different assays.
References
Armstrong and Ball 2005	DNA barcodes for biosecurity: invasive species identification, Phil. Trans. R. Soc. B, 360: 1813-1823
Bogdanowicz et al. 2000	Mitochondrial DNA Variation among Worldwide Populations of Gypsy Moths, Lymantria dispar, Molecular Phylogenetics and Evolution, 15(3): 487-495
Chen et al. 2016	DNA Barcoding of Gypsy Moths From China (Lepidoptera: Erebidae) Reveals New Haplotypes and Divergence Patterns Within Gypsy Moth Subspecies, Journal of Economic Entomology, 109(1): 366-374
de Waard et al 2010	Towards a Global Barcode Library for Lymantria (Lepidoptera: Lymantriinae) Tussock Moths of Biosecurity Concern, PlosOne, 5(12): e14280
Garner and Slavicek 1996	Identification and characterization of a RAPD-PCR marker for distinguishing Asian and North American gypsy moths, Insect Mol. Biol., 5(2):81-91
Hausmann et al 2011	DNA Barcoding the Geometrid Fauna of Bavaria (Lepidoptera): Successes, Surprises, and Questions, PlosOne, 6(2): e17134
Hebert et al. 2010	DNA barcodes for 1/1000 of the animal kingdom, Biol. Letters, 6(3): 359-362
Qian et al. 2014	COI gene geographic variation of Gypsy moth (Lepidoptera: Lymantriidae) and a TaqMan PCR diagnostic assay, DNA Barcodes, 2:10-16
Zahiri et al 2014	A Transcontinental Challenge — A Test of DNA Barcode Performance for 1,541 Species of Canadian Noctuoidea (Lepidoptera), PlosOne, 9(3): e92797
