# Supplementary material for: A Multi-Species TaqMan PCR Assay for the Identification of Asian Gypsy Moths (Lymantria spp.) and Other Invasive Lymantriines of Biosecurity Concern to North America
Source: PLoS One. 2016 Aug 11;11(8):e0160878. doi: 10.1371/journal.pone.0160878 (PMC4981461; doi:10.1371/journal.pone.0160878)
Supplement: S2 File — (XLSX) [file pone.0160878.s002.xlsx]

## Sheet: Species ID tool with examples
This is an Excel table worksheet that can be used to identify the Lymantria species present in the Taqman discrimination assays by simply entering assay results as positive (Y) or negative (N) in the worksheet.
This assay will be broken into three steps.
	Duplex 1A	Duplex 1B	Duplex 2A	Duplex 2B				Simplex 3A	Duplex 4A	Duplex 4B				Duplex 5A	Duplex 5B	Triplex 6A	Triplex 6B	Triplex 6C
Sample	L. albescens /L. postalba COI	AGM complex COI	Ldaj COI	Lda COI	Identification AGM complex		Sample	Ldd COI	Ldd FS1 Asian allele (A)	Ldd FS1 N. American allele (N)	Identification L. dispar dispar		Sample	L. monacha COI	L. fumida COI	L. mathura COI	L. xylina COI	L. lucescens COI	Identification OTLS
	y	n			Lymantria albescens/postalba			y	y	n	Lymantria dispar dispar homozygous FS1-A			y	n	n	n	n	Lymantria monacha
	n	y	n		Lymantria umbrosa			y	n	y	Lymantria dispar dispar homozygous FS1-N			n	n	n	y	n	Lymantria xylina
	n	y	y	y	Lymantria dispar asiatica			y	y	y	Lymantria dispar dispar heterozygous FS1-NA			n	y	n	n	n	Lymantria fumida
	n	y	y	n	Lymantria dispar japonica			n			Not Lymantria dispar dispar								FALSE
	n	n			Not AGM complex						FALSE								FALSE
	n	n			Not AGM complex						FALSE								FALSE
	n	n			Not AGM complex						FALSE								FALSE
	n	n			Not AGM complex						FALSE
					FALSE						FALSE
					FALSE						FALSE
					FALSE								Step 3 – Is it OTLS: Continue the analysis with all samples that were classed as “Not Lymantria dispar dispar”. Enter all OTLS results for the
					FALSE								samples (L. monacha, L. fumida, L. mathura, L. lucescens, L. xylina). The worksheet will class them correctly. All remaining negative samples will
					FALSE								be classed as “NTLS” or non-target Lymantria species.
					FALSE		Step 2 – Is it Ldd: Continue the analysis with all samples that were classed as “Not AGM complex”.
					FALSE		Enter all Lymantria dispar dispar results for the samples (Ldd COI, Ldd FS1 Asian allele, Ldd FS1 N. American allele).
							The worksheet will identify all positive L. dispar dispar samples and will class them as either homozygous FS1 Asian allele (A),
							homozygous FS1 N. American allele (N), heterozygous Asian allele/N. American allele (NA) or “Not Lymantria dispar dispar”.
Step 1 - Is it AGM: Enter all AGM complex results for all samples (AGM complex COI, Ldaj COI, Lda COI-3P, L. albescens COI).
The worksheet will identify all positive AGM samples, including whether they are L. dispar asiatica, L. dispar japonica, L. umbrosa,
L. albescens/postalba or “Not AGM complex”.

## Sheet: Species ID tool blank template
This is an Excel table worksheet that can be used to identify the Lymantria species present in the Taqman discrimination assays by simply entering assay results as positive (Y) or negative (N) in the worksheet.
This assay will be broken into three steps.
	Duplex 1A	Duplex 1B	Duplex 2A	Duplex 2B				Simplex 3A	Duplex 4A	Duplex 4B				Duplex 5A	Duplex 5B	Triplex 6A	Triplex 6B	Triplex 6C
Sample	L. albescens /L. postalba COI	AGM complex COI	Ldaj COI	Lda COI	Identification AGM complex		Sample	Ldd COI	Ldd FS1 Asian allele (A)	Ldd FS1 N. American allele (N)	Identification L. dispar dispar		Sample	L. monacha COI	L. fumida COI	L. mathura COI	L. xylina COI	L. lucescens COI	Identification OTLS
					FALSE						FALSE								FALSE
					FALSE						FALSE								FALSE
					FALSE						FALSE								FALSE
					FALSE						FALSE								FALSE
					FALSE						FALSE								FALSE
					FALSE						FALSE								FALSE
					FALSE						FALSE								FALSE
					FALSE						FALSE
					FALSE						FALSE
					FALSE						FALSE
					FALSE								Step 3 – Is it OTLS: Continue the analysis with all samples that were classed as “Not Lymantria dispar dispar”. Enter all OTLS results for the
					FALSE								samples (L. monacha, L. fumida, L. mathura, L. lucescens, L. xylina). The worksheet will class them correctly. All remaining negative samples will
					FALSE								be classed as “NTS” or non-target species.
					FALSE		Step 2 – Is it Ldd: Continue the analysis with all samples that were classed as “Not AGM complex”.
					FALSE		Enter all Lymantria dispar dispar results for the samples (Ldd COI, Ldd FS1 Asian allele, Ldd FS1 N. American allele).
							The worksheet will identify all positive L. dispar dispar samples and will class them as either homozygous FS1 Asian allele (A),
							homozygous FS1 N. American allele (N), heterozygous Asian allele/N. American allele (NA) or “Not Lymantria dispar dispar”.
Step 1 - Is it AGM: Enter all AGM complex results for all samples (AGM complex COI, Ldaj COI, Lda COI-3P, L. albescens COI).
The worksheet will identify all positive AGM samples, including whether they are L. dispar asiatica, L. dispar japonica, L. umbrosa,
L. albescens/postalba or “Not AGM complex”.
